# Supplementary material
Source: Royal Society of Chemistry journal article supplement (doi:10.1039/d5cp04717j)
Supplement: d5cp04717j1.pdf [file d5cp04717j1.pdf]

## Supplementary Material

### Theoretical Investigation of Catalytic Oxidation of Benzylalcohol by Au, Cu and Au-Cu nanoclusters

Pradeep Kumar Pal<sup>a</sup> and U. Deva Priyakumar<sup>a\*</sup>

<sup>a</sup>Center for Computational Natural Sciences and Bioinformatics,  
International Institute of Information Technology, Hyderabad, India

### Single point reaction energy profiles with SDD basis set :

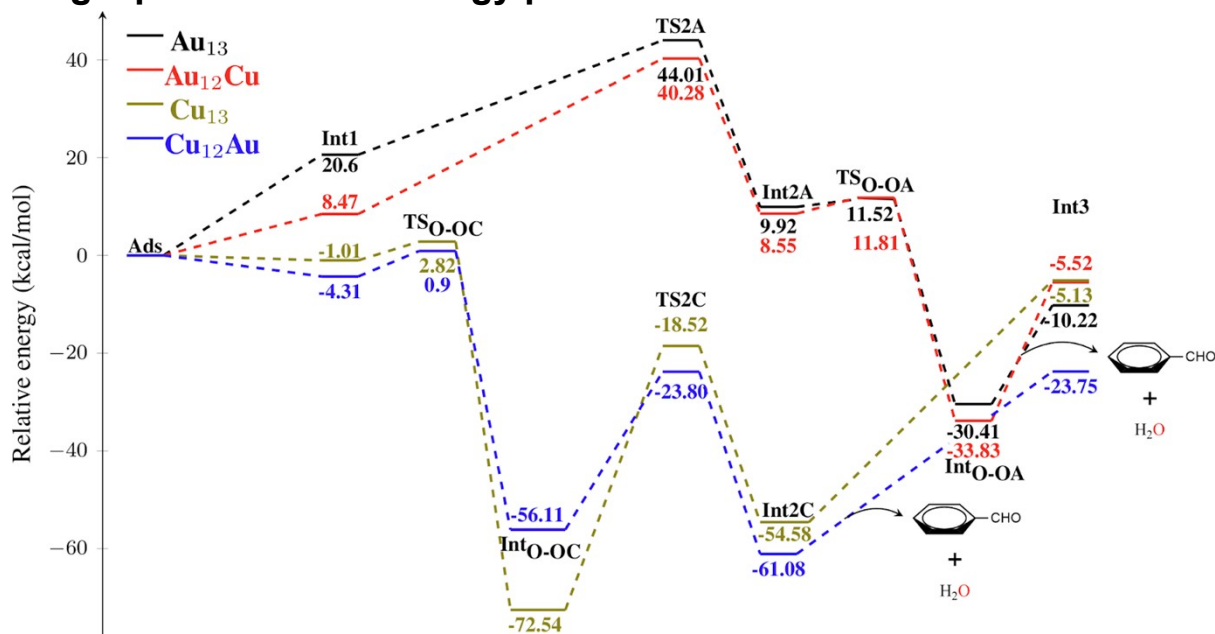

Fig S1 : Reaction energy profile of first benzyl alcohol oxidation to benzaldehyde.

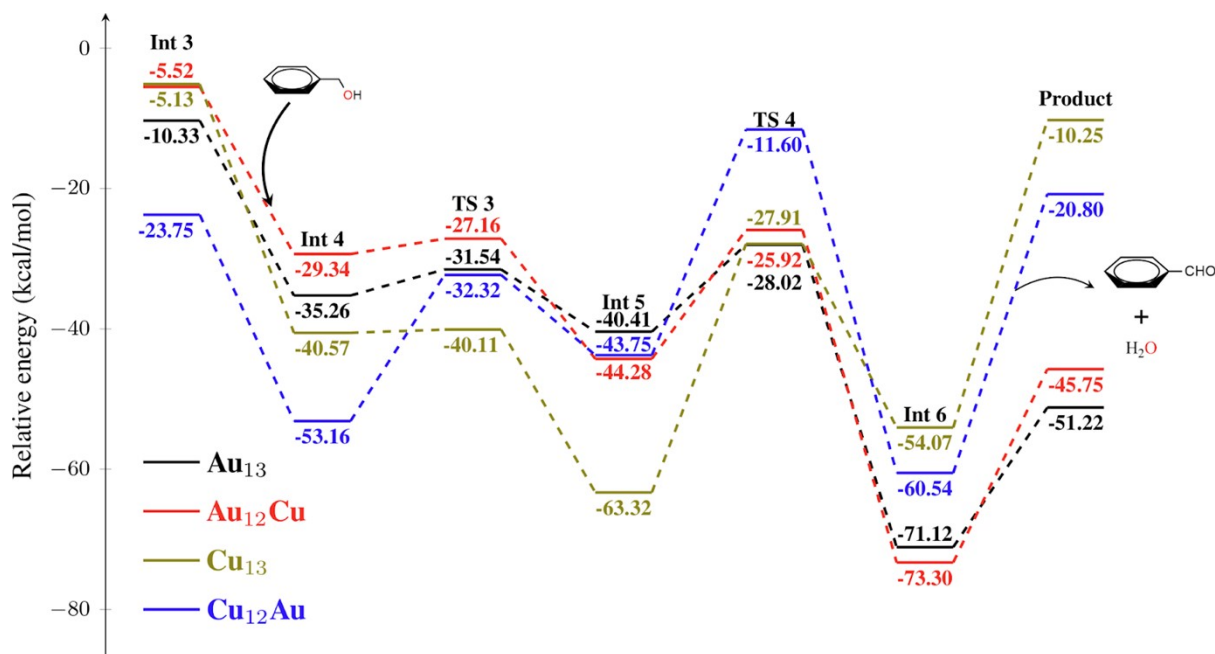

Fig S2 : Reaction energy profile of second benzyl alcohol oxidation to benzaldehyde.



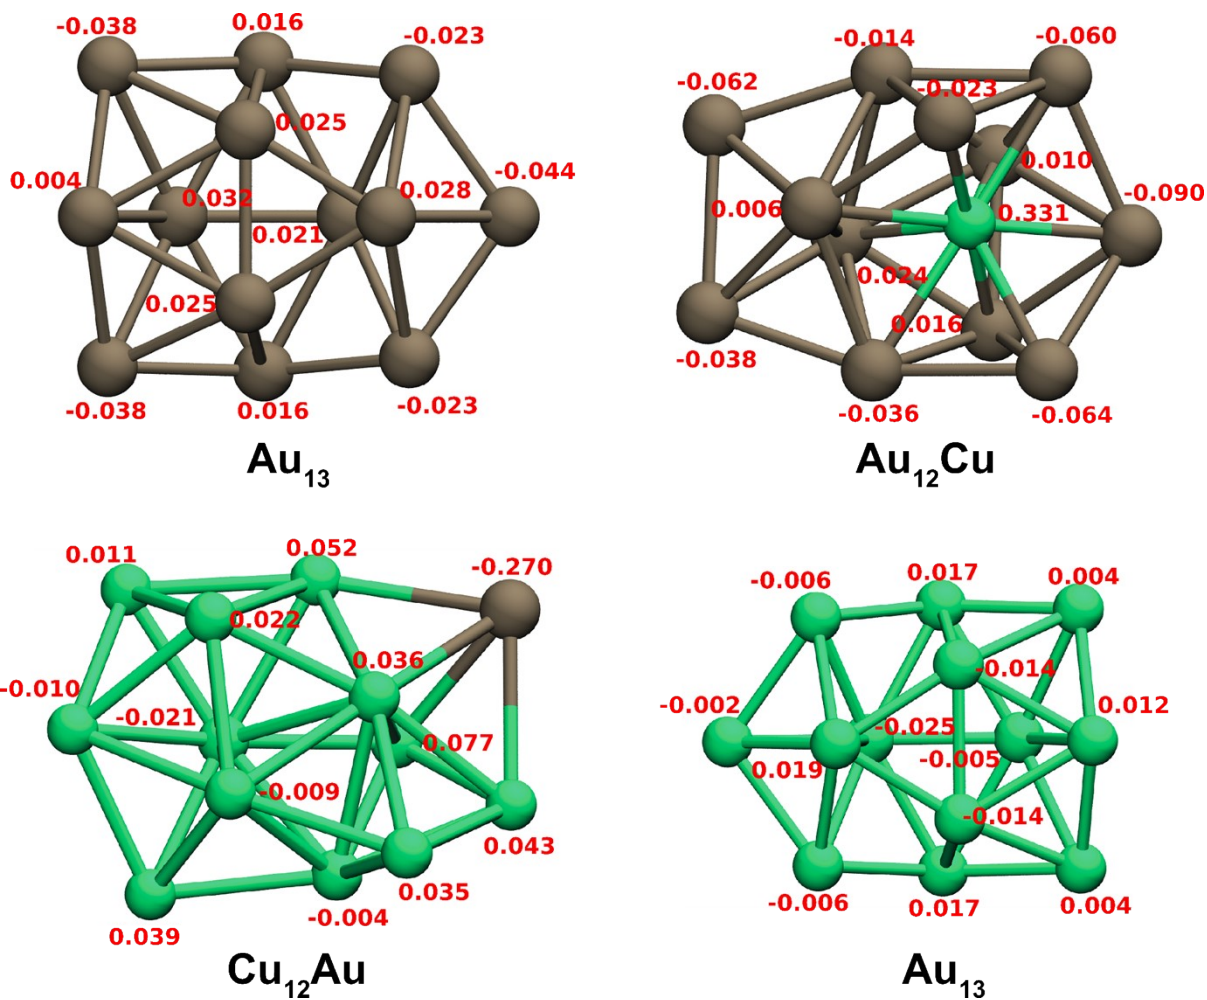

Fig S5 : Hirshfeld charge analysis of the 4 catalysts indicate higher negative charge transfer to Au atom(s) from Cu atom(s).

## Hirshfeld Charges of the O<sub>2</sub>-adsorbed clusters

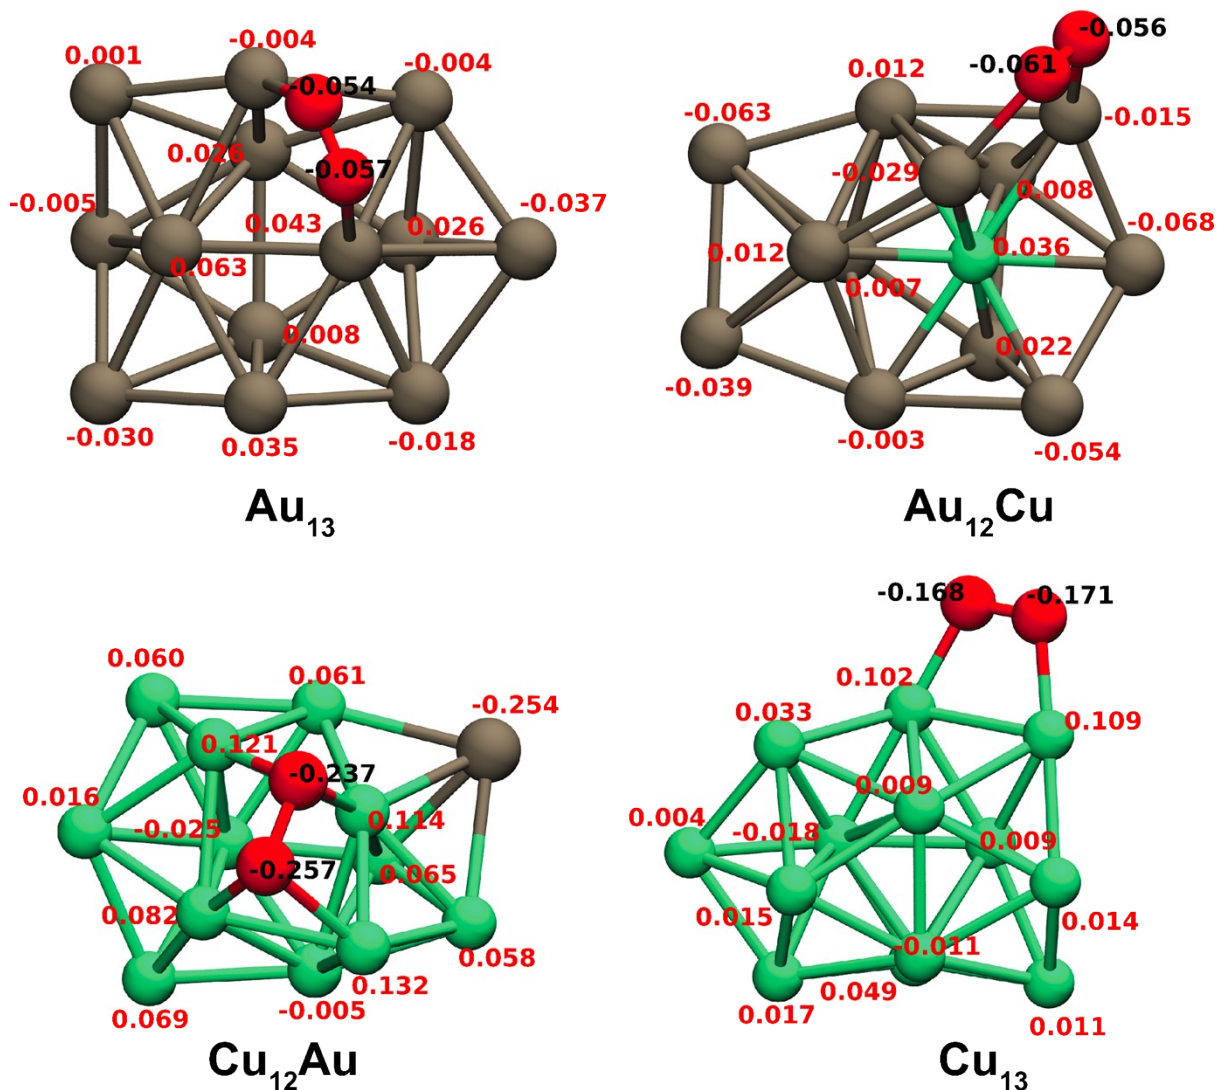

Fig S6 : Hirshfeld charge analysis of the O<sub>2</sub> adsorbed catalysts indicate higher activation of O<sub>2</sub> over Cu-rich clusters due to enhanced charge metal to oxygen charge transfer.

Table S1 : Structures of all steps in the reaction with Au<sub>13</sub> as the catalyst

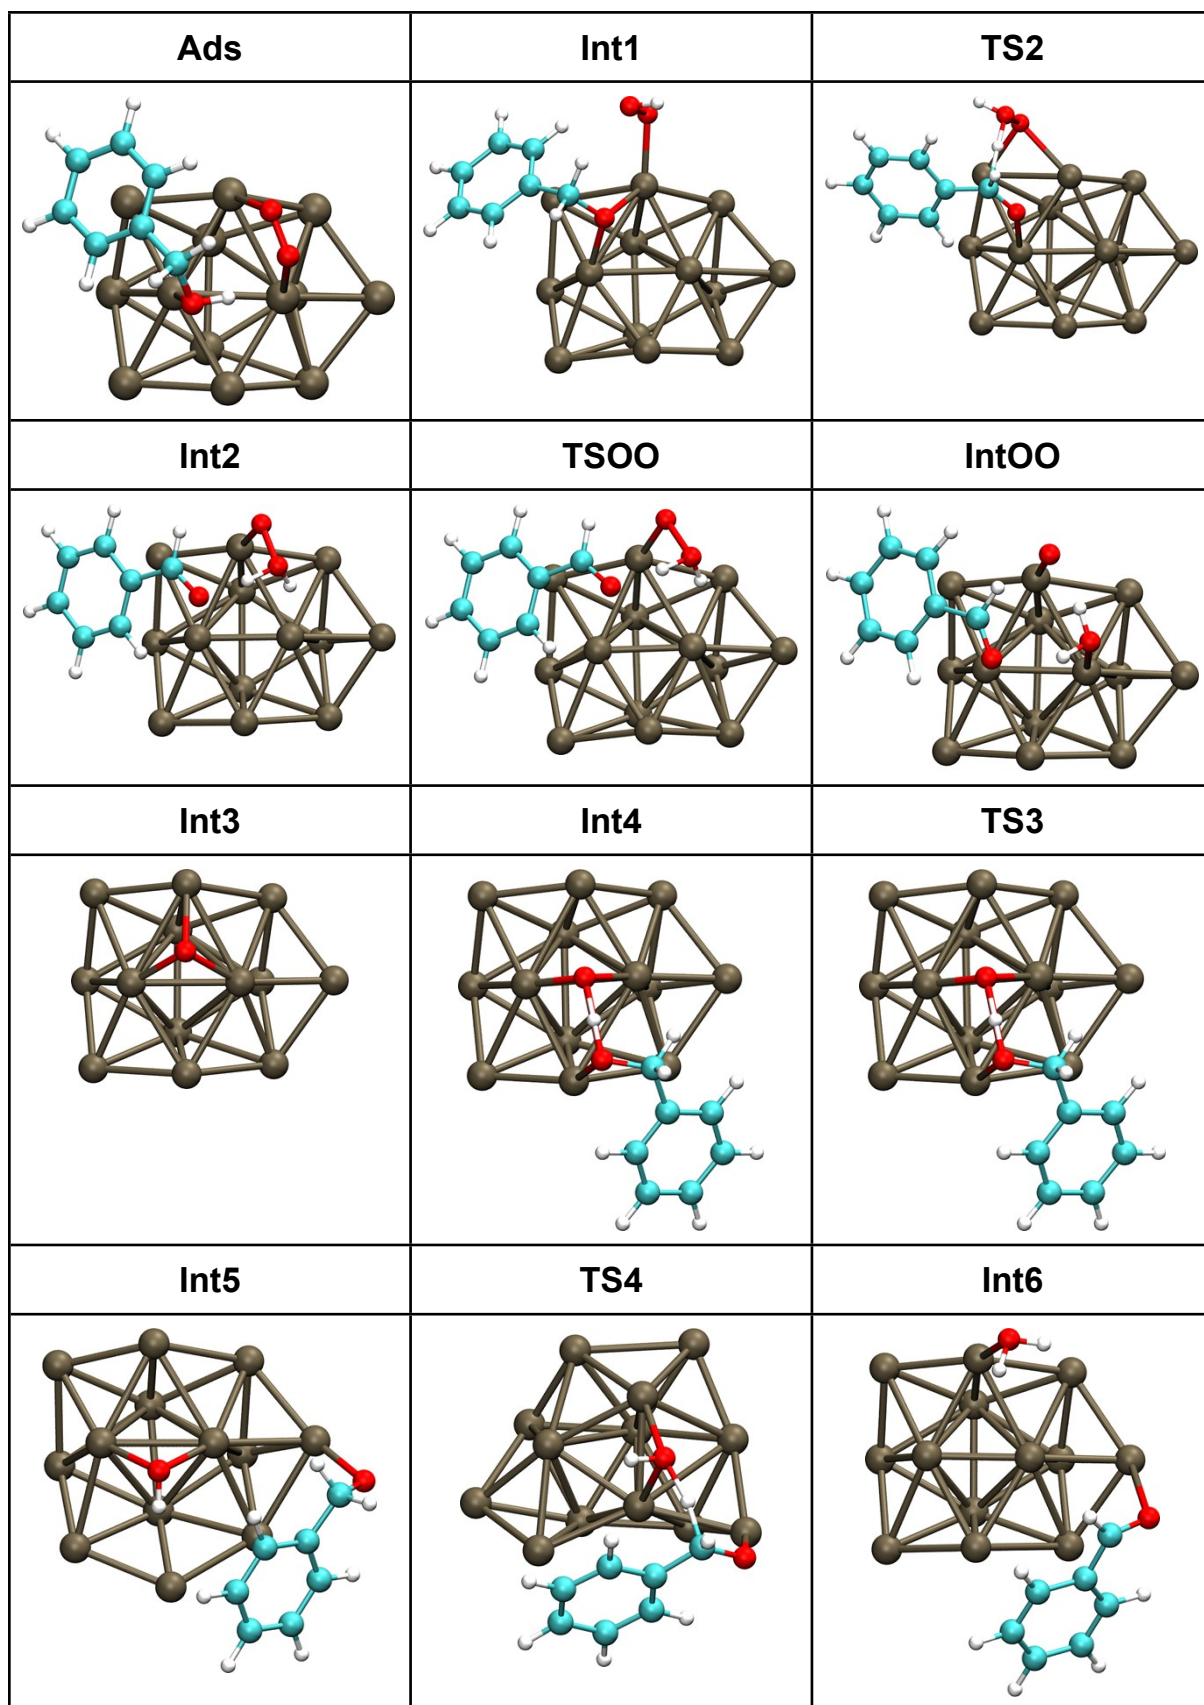

**Cartesian Coordinates of all , reactants intermediates and products of all clusters :**

## Au<sub>13</sub> cluster

### Cluster

|    |             |             |             |
|----|-------------|-------------|-------------|
| Au | 1.19691900  | 0.00001900  | -1.17009800 |
| Au | -2.73140100 | 2.46469300  | -0.15152900 |
| Au | -1.58009000 | 0.00003700  | -1.22973600 |
| Au | -0.16931000 | 2.53596900  | -1.34180700 |
| Au | -2.73142600 | -2.46469200 | -0.15153100 |
| Au | -3.04798800 | -0.00000100 | 1.16421600  |
| Au | -0.46658500 | 1.42124900  | 1.23019400  |
| Au | -0.16937500 | -2.53582100 | -1.34192700 |
| Au | 2.22562600  | -2.32379700 | 0.11395400  |
| Au | 3.87021600  | -0.00005500 | -0.22952100 |
| Au | 2.22571100  | 2.32373800  | 0.11398000  |
| Au | 1.84431100  | -0.00004100 | 1.76362600  |
| Au | -0.46660800 | -1.42129700 | 1.23017800  |

## Au<sub>13</sub>-O<sub>2</sub>

|    |             |             |             |
|----|-------------|-------------|-------------|
| Au | 1.26224100  | 0.00415300  | 1.15830900  |
| Au | -2.80588000 | -2.36679300 | 0.34358200  |
| Au | -1.57682300 | 0.07147600  | 1.16111700  |
| Au | -0.21797500 | -2.37208100 | 1.55179800  |
| Au | -2.79985900 | 2.34176600  | 0.03896900  |
| Au | -2.98282100 | -0.11217900 | -1.33925400 |
| Au | -0.50165600 | -1.56378300 | -1.17837900 |
| Au | -0.21427300 | 2.71559300  | 1.10066100  |
| Au | 2.21840300  | 2.21693300  | -0.34932700 |
| Au | 3.89134600  | -0.08057700 | 0.06483800  |
| Au | 2.15370100  | -2.38878900 | -0.08072500 |
| Au | 1.79618100  | -0.18494300 | -1.82220900 |
| Au | -0.46559400 | 1.31645900  | -1.30717800 |
| O  | 1.44628000  | 1.40727300  | 3.28410600  |
| O  | 0.95342900  | 2.57003400  | 3.21166500  |

## Ads.

|    |             |             |             |
|----|-------------|-------------|-------------|
| Au | -1.22376800 | -0.39202700 | 1.16386100  |
| Au | 1.89369400  | 3.09859700  | 0.21200600  |
| Au | 1.55344900  | 0.33536900  | 0.81498400  |
| Au | -0.39769200 | 2.27512800  | 1.71104900  |
| Au | 3.04255300  | -1.42950500 | -0.87997800 |
| Au | 2.41775300  | 1.15473200  | -1.76644800 |
| Au | -0.32107900 | 1.82881900  | -1.10023600 |
| Au | 0.84578800  | -2.57722600 | 0.53275300  |
| Au | -1.80706700 | -2.59244300 | -0.53361900 |
| Au | -3.93422900 | -0.92385100 | 0.41559200  |
| Au | -2.90450400 | 1.73687000  | 0.46186000  |
| Au | -2.25547600 | -0.02496000 | -1.70332300 |
| Au | 0.37103900  | -0.89823100 | -1.64492000 |
| O  | -0.45306300 | -1.81418700 | 3.14895800  |
| O  | 0.29524900  | -2.81987900 | 2.84799700  |
| C  | 5.17224100  | -2.41629200 | 0.74868600  |

|   |            |             |             |
|---|------------|-------------|-------------|
| C | 4.34128100 | -3.30092800 | 1.44292100  |
| C | 3.52578400 | -2.83048200 | 2.47063900  |
| C | 3.53322900 | -1.47676800 | 2.82433500  |
| C | 4.37742500 | -0.59704400 | 2.13424100  |
| C | 5.19107300 | -1.05920800 | 1.10124300  |
| H | 5.82314300 | -2.78226100 | -0.04070700 |
| H | 4.32172100 | -4.35261200 | 1.17283100  |
| H | 2.86628700 | -3.51345900 | 3.00187800  |
| H | 4.38674900 | 0.45732700  | 2.40493900  |
| H | 5.84249500 | -0.36932500 | 0.57238200  |
| C | 2.64837200 | -0.95687800 | 3.92131200  |
| H | 3.25689600 | -0.48030600 | 4.69947600  |
| H | 2.09628800 | -1.78132700 | 4.38430100  |
| O | 1.74008500 | 0.04581900  | 3.44400700  |
| H | 0.85532700 | -0.35701500 | 3.41389000  |

### Int1

|    |             |             |             |
|----|-------------|-------------|-------------|
| Au | -1.20673000 | -0.37258000 | 1.01994700  |
| Au | 1.66007200  | 3.25006600  | 0.19557600  |
| Au | 1.58884300  | 0.56987100  | 1.00053100  |
| Au | -0.64635600 | 2.31402000  | 1.72951100  |
| Au | 3.05001900  | -1.32093000 | -0.89238200 |
| Au | 2.34712100  | 1.22703800  | -1.64417000 |
| Au | -0.45993000 | 1.80801800  | -1.05378000 |
| Au | 0.77465100  | -2.39312500 | 0.89680100  |
| Au | -1.66457800 | -2.66095800 | -0.50423800 |
| Au | -3.92601800 | -1.13904600 | 0.35220000  |
| Au | -3.10379600 | 1.56541200  | 0.58719400  |
| Au | -2.30270300 | -0.11362400 | -1.76319900 |
| Au | 0.39953400  | -0.88381700 | -1.53068200 |
| O  | 2.00610600  | -4.38335100 | 2.77912800  |
| O  | 1.35032400  | -4.41636200 | 1.54856000  |
| C  | 5.99376600  | -1.24534800 | 0.01369100  |
| C  | 5.20147500  | -2.38777600 | 0.21370000  |
| C  | 4.27375700  | -2.42173400 | 1.26948600  |
| C  | 4.11603900  | -1.30785400 | 2.11126000  |
| C  | 4.91843900  | -0.18475400 | 1.89769800  |
| C  | 5.85380300  | -0.15130300 | 0.86194400  |
| H  | 6.71498600  | -1.22427400 | -0.79747100 |
| H  | 5.34415100  | -3.26718700 | -0.40872800 |
| H  | 3.67195200  | -3.31274100 | 1.43927900  |
| H  | 4.79609700  | 0.68037700  | 2.54736000  |
| H  | 6.46503300  | 0.73357900  | 0.71178800  |
| C  | 3.01967800  | -1.28684200 | 3.14018600  |
| H  | 3.26721300  | -0.55254600 | 3.92588700  |
| H  | 2.95308400  | -2.27676100 | 3.62381700  |
| O  | 1.75810000  | -0.99825500 | 2.60252000  |
| H  | 1.30928800  | -4.66035900 | 3.39714200  |

### TS2<sub>A</sub>

|    |             |             |             |
|----|-------------|-------------|-------------|
| Au | 1.27807800  | -0.37278400 | -1.16243200 |
| Au | -1.72649200 | 3.14870600  | 0.00958000  |

|    |             |             |             |
|----|-------------|-------------|-------------|
| Au | -1.44881700 | 0.47024200  | -0.88240800 |
| Au | 0.54175000  | 2.35078500  | -1.65347700 |
| Au | -2.90474900 | -1.49070200 | 0.84488500  |
| Au | -2.35661900 | 0.99719100  | 1.75984500  |
| Au | 0.47110900  | 1.72732700  | 1.11562000  |
| Au | -0.62392700 | -2.37597100 | -0.97055900 |
| Au | 1.89703600  | -2.65323600 | 0.31684900  |
| Au | 4.04103600  | -1.00269100 | -0.55990900 |
| Au | 3.06357900  | 1.65393800  | -0.59081600 |
| Au | 2.43726000  | -0.13451300 | 1.64706900  |
| Au | -0.21867300 | -0.98495300 | 1.54839400  |
| O  | -3.50618000 | -3.78568300 | -1.52428500 |
| O  | -2.60642800 | -3.56248600 | -0.33712000 |
| C  | -7.19045100 | -0.20352900 | -0.63730000 |
| C  | -7.20511800 | -1.29279400 | -1.51352800 |
| C  | -6.05490300 | -1.64990700 | -2.20057500 |
| C  | -4.85276400 | -0.92997000 | -2.03178700 |
| C  | -4.86318800 | 0.17899500  | -1.16539700 |
| C  | -6.01730500 | 0.53295700  | -0.47667600 |
| H  | -8.09039500 | 0.07523500  | -0.09769500 |
| H  | -8.12101200 | -1.85819200 | -1.66194200 |
| H  | -6.07301300 | -2.49076400 | -2.89586500 |
| H  | -3.96447100 | 0.78291100  | -1.05543100 |
| H  | -5.99903400 | 1.39637400  | 0.18356500  |
| C  | -3.64821400 | -1.40757700 | -2.71059800 |
| H  | -3.84286500 | -1.95214100 | -3.65667300 |
| H  | -3.57677600 | -2.75968900 | -2.02135700 |
| O  | -2.45838600 | -0.89851100 | -2.59809900 |
| H  | -4.36793000 | -3.92304500 | -1.09192100 |

## Int2<sub>A</sub>

|    |             |             |             |
|----|-------------|-------------|-------------|
| Au | -1.22488800 | -0.31633800 | 1.13384100  |
| Au | 2.08473000  | 2.95142000  | 0.19534800  |
| Au | 1.47348600  | 0.18794400  | 0.81621600  |
| Au | -0.24546100 | 2.32974500  | 1.67581400  |
| Au | 2.86037000  | -1.77430700 | -0.91987000 |
| Au | 2.53379400  | 0.91954700  | -1.70072500 |
| Au | -0.18542900 | 1.80672000  | -1.13578000 |
| Au | 0.62897800  | -2.64326600 | 0.58118200  |
| Au | -2.05393000 | -2.46968600 | -0.53485500 |
| Au | -3.95162700 | -0.60771200 | 0.55282700  |
| Au | -2.76373800 | 2.00335800  | 0.41633000  |
| Au | -2.29469800 | 0.12418100  | -1.68083900 |
| Au | 0.24717000  | -1.00630000 | -1.64256700 |
| O  | -0.40421800 | -2.71495100 | 3.42301600  |
| O  | 0.22017700  | -3.73933900 | 2.50980400  |
| C  | 5.74491300  | -0.26128400 | 0.97576400  |
| C  | 5.65273200  | -1.65438300 | 0.99595600  |
| C  | 4.67265800  | -2.26873100 | 1.76781900  |
| C  | 3.78584500  | -1.48946800 | 2.52401300  |
| C  | 3.89525000  | -0.08670900 | 2.51337700  |
| C  | 4.87306900  | 0.52168100  | 1.73576300  |

|   |             |             |            |
|---|-------------|-------------|------------|
| H | 6.49774400  | 0.21915400  | 0.35773600 |
| H | 6.33454300  | -2.25407800 | 0.40106100 |
| H | 4.56515600  | -3.35165700 | 1.77083900 |
| H | 3.20701600  | 0.49906600  | 3.11898600 |
| H | 4.94644900  | 1.60506000  | 1.70653700 |
| C | 2.67677500  | -2.14172200 | 3.19940100 |
| H | 2.62108900  | -3.24271400 | 3.11087800 |
| H | 0.43758700  | -2.20165500 | 3.73289700 |
| O | 1.79397800  | -1.52202900 | 3.80774700 |
| H | -0.88842300 | -2.09808000 | 2.80708100 |

### Int3<sub>A</sub>

|    |             |             |             |
|----|-------------|-------------|-------------|
| Au | 1.29735100  | -0.04342400 | 1.23098400  |
| Au | -2.77275600 | -2.42578900 | 0.16265300  |
| Au | -1.72263100 | -0.05687500 | 1.22309900  |
| Au | -0.18514900 | -2.58623400 | 1.30789400  |
| Au | -2.73539500 | 2.42048600  | 0.06823600  |
| Au | -2.97783900 | -0.00999700 | -1.28799600 |
| Au | -0.44689600 | -1.43324600 | -1.23556900 |
| Au | -0.18357600 | 2.68217000  | 1.34203100  |
| Au | 2.19244000  | 2.29132100  | -0.16789000 |
| Au | 3.90193100  | 0.00704100  | 0.16368300  |
| Au | 2.23449600  | -2.31653100 | -0.07811700 |
| Au | 1.85478600  | -0.02473900 | -1.78666100 |
| Au | -0.43467200 | 1.41368700  | -1.20422000 |
| O  | -0.21813900 | 0.81105700  | 2.58600800  |

### TS<sub>O-OA</sub>

|    |             |             |             |
|----|-------------|-------------|-------------|
| Au | -1.22164500 | -0.34487700 | 1.09967000  |
| Au | 2.04431900  | 2.98319400  | 0.25270200  |
| Au | 1.47476600  | 0.19485600  | 0.82543600  |
| Au | -0.27714200 | 2.27725300  | 1.74539900  |
| Au | 2.90578500  | -1.68347500 | -0.93426100 |
| Au | 2.51687700  | 1.00808800  | -1.69178400 |
| Au | -0.21538400 | 1.84097500  | -1.09133900 |
| Au | 0.69091800  | -2.64189400 | 0.55729100  |
| Au | -2.00813400 | -2.47973900 | -0.59082500 |
| Au | -3.94736500 | -0.67076000 | 0.52105100  |
| Au | -2.79683400 | 1.97295800  | 0.43962800  |
| Au | -2.27250500 | 0.13659900  | -1.69812200 |
| Au | 0.28230200  | -0.96197000 | -1.64236100 |
| O  | -0.50799700 | -2.93136900 | 3.36766500  |
| O  | 0.28229300  | -3.90181100 | 2.26759200  |
| C  | 5.62353200  | -0.33863500 | 0.94475300  |
| C  | 5.53581900  | -1.73250700 | 0.93503200  |
| C  | 4.58392300  | -2.36933700 | 1.72562900  |
| C  | 3.71533300  | -1.61311600 | 2.52348800  |
| C  | 3.81707300  | -0.21007100 | 2.53893300  |
| C  | 4.77346800  | 0.42146500  | 1.75134800  |
| H  | 6.35652600  | 0.15882500  | 0.31593700  |
| H  | 6.20163200  | -2.31621200 | 0.30647000  |
| H  | 4.48129200  | -3.45268600 | 1.70798700  |

|   |             |             |            |
|---|-------------|-------------|------------|
| H | 3.14655700  | 0.35892200  | 3.17944000 |
| H | 4.84440500  | 1.50558100  | 1.74855500 |
| C | 2.62454100  | -2.28918800 | 3.21628200 |
| H | 2.59814200  | -3.39177600 | 3.12548400 |
| H | 0.30771300  | -2.43865500 | 3.70774500 |
| O | 1.73631500  | -1.69220100 | 3.83052300 |
| H | -0.96390000 | -2.29805900 | 2.76300000 |

### Int<sub>o</sub>-oA

|    |             |             |             |
|----|-------------|-------------|-------------|
| Au | 1.26111200  | 0.37884800  | 1.14707100  |
| Au | -2.15060200 | -2.91002800 | 0.24547200  |
| Au | -1.53506700 | -0.21902000 | 0.78439600  |
| Au | 0.17593000  | -2.22581500 | 1.78353600  |
| Au | -2.95253200 | 1.58556300  | -0.89084300 |
| Au | -2.43893300 | -1.03285800 | -1.84277100 |
| Au | 0.19735600  | -1.88840700 | -1.09685400 |
| Au | -0.68007600 | 2.61617400  | 0.60258900  |
| Au | 2.00713000  | 2.46467100  | -0.66542600 |
| Au | 4.02285500  | 0.66763200  | 0.37470100  |
| Au | 2.74354200  | -1.90917300 | 0.53067000  |
| Au | 2.22913700  | -0.16303900 | -1.66860400 |
| Au | -0.30232900 | 0.95408200  | -1.61746200 |
| O  | 1.14624700  | 1.68764400  | 3.22949500  |
| O  | -0.47106900 | 3.73691100  | 2.30119400  |
| C  | -5.50796400 | 1.53585700  | 0.99554600  |
| C  | -4.92157000 | 2.77727900  | 1.26700400  |
| C  | -3.84642700 | 2.85665100  | 2.14953400  |
| C  | -3.34894200 | 1.69283300  | 2.74434600  |
| C  | -3.94790800 | 0.44970700  | 2.47941200  |
| C  | -5.02970500 | 0.37445500  | 1.61034700  |
| H  | -6.34772900 | 1.47572100  | 0.30841700  |
| H  | -5.30467900 | 3.67481200  | 0.79025500  |
| H  | -3.34860900 | 3.80511900  | 2.34459600  |
| H  | -3.54459200 | -0.43636600 | 2.96579700  |
| H  | -5.48685000 | -0.58607900 | 1.39061900  |
| C  | -2.12285300 | 1.76597200  | 3.55006200  |
| H  | -1.74822300 | 2.79559700  | 3.74812700  |
| H  | 0.47682000  | 1.21353700  | 3.74983200  |
| O  | -1.50512500 | 0.78213900  | 3.93601500  |
| H  | 0.67147500  | 2.51578900  | 2.95953100  |

### Int4

|    |             |             |             |
|----|-------------|-------------|-------------|
| Au | -1.21564500 | -0.42180600 | 1.00745000  |
| Au | 1.76174000  | 3.16251700  | -0.43673200 |
| Au | 1.55617200  | 0.79394300  | 1.10991100  |
| Au | -0.77023300 | 2.52063700  | 0.67832300  |
| Au | 3.59114000  | -1.21693200 | 0.64438600  |
| Au | 3.01128700  | 0.75649200  | -1.27578700 |
| Au | 0.13142400  | 1.07904600  | -1.54555200 |
| Au | 1.13211800  | -2.08579600 | 1.83980500  |
| Au | -0.87702700 | -3.18169300 | 0.13216600  |

|    |             |             |             |
|----|-------------|-------------|-------------|
| Au | -3.39767600 | -1.72420300 | -0.10464000 |
| Au | -2.74210300 | 0.98016600  | -0.90321900 |
| Au | -1.27252600 | -1.25232700 | -1.92580500 |
| Au | 1.28523300  | -1.54493700 | -0.97155800 |
| O  | 0.20687900  | -0.06676700 | 2.64233600  |
| C  | -2.48321100 | 3.85108800  | 1.96348900  |
| C  | -3.12133500 | 4.45951700  | 0.87122200  |
| C  | -4.24248900 | 3.86467900  | 0.29920100  |
| C  | -4.74537700 | 2.67776800  | 0.83884100  |
| C  | -4.11856900 | 2.07312500  | 1.92903300  |
| C  | -2.97413700 | 2.63727500  | 2.49411200  |
| H  | -1.65134100 | 4.34361700  | 2.46369700  |
| H  | -2.73464500 | 5.39526300  | 0.47844600  |
| H  | -4.73016600 | 4.32449100  | -0.55486100 |
| H  | -5.62122800 | 2.20959300  | 0.39676600  |
| H  | -4.49256100 | 1.12596800  | 2.31274800  |
| C  | -2.23144800 | 1.96658600  | 3.62038800  |
| H  | -2.42300900 | 0.88374700  | 3.58325700  |
| H  | -2.62712300 | 2.32701300  | 4.58263700  |
| O  | -0.85087500 | 2.24877000  | 3.56600200  |
| H  | -0.38702100 | 1.41066600  | 3.32185800  |

### TS3

|    |             |             |             |
|----|-------------|-------------|-------------|
| Au | -1.06176000 | -0.78356000 | 1.12158000  |
| Au | 1.43343600  | 3.38545900  | -0.37433100 |
| Au | 1.46342600  | 0.86752600  | 1.18239700  |
| Au | -0.93547300 | 2.53592000  | 0.78895600  |
| Au | 3.71721700  | -0.82736400 | 0.66213000  |
| Au | 2.91890300  | 1.14293300  | -1.17355900 |
| Au | -0.01242900 | 1.21706500  | -1.48337000 |
| Au | 1.46195600  | -2.21037700 | 1.58987900  |
| Au | -0.47928800 | -3.33278800 | -0.09834100 |
| Au | -3.14612100 | -2.13646600 | -0.06743800 |
| Au | -2.81479500 | 0.70630500  | -0.60778500 |
| Au | -1.20063300 | -1.21430400 | -1.88883600 |
| Au | 1.42920800  | -1.29907300 | -1.07730700 |
| O  | 0.01730400  | 0.22819100  | 2.67458300  |
| C  | -3.45879000 | 3.65708800  | 1.69715600  |
| C  | -4.17654100 | 4.28814300  | 0.68054900  |
| C  | -5.14118900 | 3.58583700  | -0.03673900 |
| C  | -5.40350100 | 2.25263900  | 0.27917700  |
| C  | -4.69408700 | 1.62176600  | 1.30694600  |
| C  | -3.70202700 | 2.31305600  | 2.01893900  |
| H  | -2.70931800 | 4.20391600  | 2.26583700  |
| H  | -3.97561900 | 5.32953800  | 0.44657500  |
| H  | -5.69000400 | 4.07232100  | -0.83731500 |
| H  | -6.15871600 | 1.69719400  | -0.27028700 |
| H  | -4.90374500 | 0.58318800  | 1.55769000  |
| C  | -2.85788600 | 1.61878900  | 3.05271000  |
| H  | -2.90222000 | 0.52902200  | 2.87027600  |
| H  | -3.28252800 | 1.78809100  | 4.05611500  |
| O  | -1.52927800 | 2.08619900  | 3.02799000  |

|   |             |            |            |
|---|-------------|------------|------------|
| H | -0.79600500 | 1.20696300 | 2.95425500 |
|---|-------------|------------|------------|

## Int5

|    |             |             |             |
|----|-------------|-------------|-------------|
| Au | -0.86457000 | -0.72241000 | 1.04352600  |
| Au | 1.33703400  | 3.29677400  | 0.21937800  |
| Au | 1.78596000  | 0.60000700  | 1.38013500  |
| Au | -1.43946400 | 3.15984200  | 0.27044300  |
| Au | 3.89810500  | -0.87602200 | 0.43468700  |
| Au | 2.89908100  | 1.35873100  | -1.08886900 |
| Au | 0.00880700  | 1.30181400  | -1.22753500 |
| Au | 1.70429300  | -2.39809400 | 1.36159500  |
| Au | -0.53260400 | -3.22899500 | -0.14270200 |
| Au | -3.09890100 | -2.04662700 | -0.02699400 |
| Au | -2.75935200 | 0.85269500  | -0.66801800 |
| Au | -1.21290400 | -1.11631000 | -1.92669300 |
| Au | 1.45703900  | -1.13537500 | -1.12335400 |
| O  | -0.12018100 | 0.73903400  | 2.53975200  |
| C  | -3.62545000 | 1.40759900  | 2.78052800  |
| C  | -3.44272300 | 2.77964500  | 2.60827400  |
| C  | -4.05202400 | 3.44569600  | 1.53725100  |
| C  | -4.82972000 | 2.72143800  | 0.62821400  |
| C  | -4.99993500 | 1.34252000  | 0.79481400  |
| C  | -4.41602300 | 0.67570400  | 1.89022900  |
| H  | -3.14304000 | 0.89514900  | 3.61063000  |
| H  | -2.82938400 | 3.33661800  | 3.31239100  |
| H  | -3.93897100 | 4.52104900  | 1.42574800  |
| H  | -5.30232300 | 3.22778400  | -0.20862100 |
| H  | -5.62815600 | 0.76501900  | 0.11943100  |
| C  | -4.68203400 | -0.79501100 | 2.10722700  |
| H  | -5.59915000 | -0.86095100 | 2.72683600  |
| H  | -3.88070100 | -1.20797300 | 2.74884700  |
| O  | -4.91888100 | -1.53366300 | 0.96350500  |
| H  | -0.49780700 | 1.57847400  | 2.21707600  |

## TS4

|    |             |             |             |
|----|-------------|-------------|-------------|
| Au | -1.63911900 | -0.16956400 | 1.44580000  |
| Au | 3.99421800  | -0.53422000 | -0.36996300 |
| Au | 1.51570500  | -0.29225200 | 1.26683500  |
| Au | 2.88912300  | 1.95576900  | 0.31019700  |
| Au | 0.04818900  | -2.59448300 | 1.59876100  |
| Au | 2.07658600  | -2.51711400 | -0.43578600 |
| Au | 1.60231500  | 0.19571600  | -1.70647600 |
| Au | -2.67600000 | -2.64369400 | 0.51919000  |
| Au | -3.26908300 | -0.33009600 | -0.95472200 |
| Au | -2.77004500 | 2.23904000  | -0.27996800 |
| Au | 0.09145600  | 1.89125400  | 0.20431200  |
| Au | -1.04885100 | 0.96607700  | -2.21557000 |
| Au | -0.53776000 | -1.42638600 | -0.91428200 |
| O  | -1.71859300 | 1.26181100  | 3.11449000  |
| C  | 0.39360500  | 4.10958600  | 2.86095100  |
| C  | 1.71253300  | 4.42838200  | 2.56392300  |
| C  | 2.06758300  | 4.82965600  | 1.27059500  |

|   |             |            |             |
|---|-------------|------------|-------------|
| C | 1.08592100  | 4.92067300 | 0.28225300  |
| C | -0.24140500 | 4.59214300 | 0.57738600  |
| C | -0.60517300 | 4.18097900 | 1.87565300  |
| H | 0.12116400  | 3.80293300 | 3.86972600  |
| H | 2.47212600  | 4.36400300 | 3.33787800  |
| H | 3.09589000  | 5.10047200 | 1.04535200  |
| H | 1.34788400  | 5.24940700 | -0.71968100 |
| H | -1.02228600 | 4.70323500 | -0.17181700 |
| C | -2.01848100 | 3.80466900 | 2.20599900  |
| H | -2.37496600 | 4.32336600 | 3.11634000  |
| H | -1.93683000 | 2.67302000 | 2.62597900  |
| O | -2.92497700 | 3.84121900 | 1.22400400  |
| H | -0.78396900 | 1.29909900 | 3.36988300  |

### Int6

|    |             |             |             |
|----|-------------|-------------|-------------|
| Au | -1.02505200 | -0.50463500 | 0.93597600  |
| Au | 1.70112600  | 3.25182500  | -0.00354900 |
| Au | 1.52302300  | 0.57666900  | 1.20813300  |
| Au | -0.70792100 | 2.30413300  | 1.14572800  |
| Au | 3.66508000  | -1.16509000 | 0.54522100  |
| Au | 3.05448800  | 1.04046900  | -1.13815600 |
| Au | 0.18386000  | 1.32131600  | -1.42218700 |
| Au | 1.26803600  | -2.35477900 | 1.44493700  |
| Au | -0.93108300 | -3.10927900 | -0.19833500 |
| Au | -3.37264500 | -1.58119300 | -0.17792500 |
| Au | -2.67204600 | 1.16469900  | -0.85618100 |
| Au | -1.28984900 | -0.94937500 | -2.02572400 |
| Au | 1.31583500  | -1.32141800 | -1.12356500 |
| O  | 0.33394900  | -3.04658100 | 3.68739800  |
| C  | -3.00345500 | 2.82021500  | 2.62754700  |
| C  | -2.69803600 | 4.03949100  | 2.00542200  |
| C  | -3.35048000 | 4.39343800  | 0.81747400  |
| C  | -4.27509900 | 3.52505700  | 0.23821500  |
| C  | -4.56584100 | 2.29899500  | 0.84681400  |
| C  | -3.94331800 | 1.95070100  | 2.05669100  |
| H  | -2.53131300 | 2.55014300  | 3.57094100  |
| H  | -1.99701300 | 4.72693400  | 2.46990000  |
| H  | -3.12038500 | 5.33995600  | 0.33895300  |
| H  | -4.77548000 | 3.80080700  | -0.68524600 |
| H  | -5.30348300 | 1.61674500  | 0.43126200  |
| C  | -4.18934700 | 0.63859700  | 2.66626200  |
| H  | -3.65631900 | 0.47062600  | 3.63261700  |
| O  | -4.88723700 | -0.22932700 | 2.17159800  |
| H  | 0.17752500  | -2.16542500 | 4.04737200  |
| H  | -0.52896400 | -3.32539000 | 3.35641700  |

### Au<sub>12</sub>Cu Cluster

|    |             |             |             |
|----|-------------|-------------|-------------|
| Au | -1.73383900 | 0.25243300  | 1.45042400  |
| Au | -0.71305600 | -2.36660600 | 0.70349500  |
| Au | -1.17892100 | -0.41101100 | -1.45922900 |

|    |             |             |             |
|----|-------------|-------------|-------------|
| Au | -3.32251700 | -1.53752400 | 0.06381800  |
| Au | 2.03943200  | -2.27906900 | 1.27191500  |
| Au | 3.37407000  | -0.25437000 | -0.17051500 |
| Au | 1.22534700  | -1.88369700 | -1.41883100 |
| Au | 1.29474800  | 0.83081700  | -2.04998700 |
| Au | -3.23917300 | 1.36707900  | -0.71079100 |
| Au | 0.34067000  | 1.74870900  | 2.35162800  |
| Au | 2.21936600  | 2.29207800  | 0.18471400  |
| Au | -0.59828800 | 2.25387100  | -0.38821800 |
| Cu | 0.79588500  | -0.03462800 | 0.46740300  |

### **Au<sub>12</sub>Cu-O<sub>2</sub>**

|    |             |             |             |
|----|-------------|-------------|-------------|
| Au | -1.66754400 | 0.52069400  | 1.42180000  |
| Au | -0.95386200 | -2.17763600 | 0.99855600  |
| Au | -1.31438000 | -0.49713400 | -1.44795600 |
| Au | -3.50868900 | -1.19568100 | 0.29080100  |
| Au | 1.86534100  | -2.33974900 | 1.43838400  |
| Au | 3.27669600  | -0.66735400 | -0.32076600 |
| Au | 0.87157600  | -2.24294700 | -1.20202100 |
| Au | 1.29996000  | 0.38615300  | -2.17535900 |
| Au | -3.19514900 | 1.49705500  | -0.85929600 |
| Au | 0.54261400  | 1.88017700  | 2.16402400  |
| Au | 2.47095200  | 1.98705700  | -0.21142600 |
| Au | -0.46817600 | 2.15059700  | -0.61844100 |
| Cu | 0.75994600  | -0.11124500 | 0.41276500  |
| O  | 2.16633400  | 3.56499600  | 2.38337500  |
| O  | 2.78790700  | 3.73860000  | 1.27213600  |

### **Ads**

|    |             |             |             |
|----|-------------|-------------|-------------|
| Au | 1.67334200  | -0.56317000 | 1.52593500  |
| Au | 1.92432700  | 2.04055600  | 0.45766400  |
| Au | 1.36694000  | -0.21916400 | -1.47640700 |
| Au | 3.86902800  | 0.08461700  | -0.02214300 |
| Au | -0.54419500 | 3.35629300  | 0.87593000  |
| Au | -2.67429800 | 1.97692400  | -0.34738100 |
| Au | -0.00566700 | 2.20164400  | -1.65075200 |
| Au | -1.46686300 | -0.20489900 | -1.88560800 |
| Au | 2.54563400  | -2.53510700 | -0.42640700 |
| Au | -0.75493200 | -0.90092300 | 2.66150800  |
| Au | -2.90643000 | -0.61019300 | 0.53113200  |
| Au | -0.22524800 | -2.09666500 | 0.09172900  |
| Cu | -0.48118200 | 0.66880200  | 0.48158100  |
| O  | -2.77267700 | -1.71228000 | 3.46714300  |
| O  | -3.61646700 | -1.70939300 | 2.47560400  |
| C  | -1.45735100 | -2.90429500 | -3.44882500 |
| C  | -2.72890300 | -2.37789100 | -3.19004500 |
| C  | -3.40572900 | -2.70339700 | -2.00853500 |
| C  | -2.81532800 | -3.55054500 | -1.06760600 |
| C  | -1.53971800 | -4.08020800 | -1.33796800 |
| C  | -0.86926600 | -3.76418500 | -2.52315700 |
| H  | -0.93582000 | -2.64722100 | -4.36557200 |

|   |             |             |             |
|---|-------------|-------------|-------------|
| H | -3.20823000 | -1.73193200 | -3.92188000 |
| H | -4.38566600 | -2.28739300 | -1.79771100 |
| H | -1.08823700 | -4.77815500 | -0.63271600 |
| H | 0.12150400  | -4.17042300 | -2.70395100 |
| C | -3.51306500 | -3.89776800 | 0.21922500  |
| H | -2.81576800 | -3.73392700 | 1.05753500  |
| H | -3.75805800 | -4.97356400 | 0.21995700  |
| O | -4.68115200 | -3.12294200 | 0.37325600  |
| H | -4.76624800 | -2.90905800 | 1.31120700  |

## Int1

|    |             |             |             |
|----|-------------|-------------|-------------|
| Au | 1.52932700  | -0.66954700 | 1.53242600  |
| Au | 1.87182200  | 2.01890000  | 0.68554400  |
| Au | 1.47377100  | -0.10467700 | -1.44851500 |
| Au | 3.84439800  | 0.11828900  | 0.21927800  |
| Au | -0.60720300 | 3.33999300  | 0.98448600  |
| Au | -2.66261900 | 1.98793100  | -0.39013500 |
| Au | 0.10551900  | 2.32509100  | -1.53814200 |
| Au | -1.31710300 | -0.06999000 | -2.02512700 |
| Au | 2.65425300  | -2.45896600 | -0.50109100 |
| Au | -1.01753000 | -1.12463700 | 2.40070900  |
| Au | -2.98996400 | -0.62018000 | 0.22852000  |
| Au | -0.17339800 | -2.11990900 | -0.15953000 |
| Cu | -0.52432200 | 0.64065100  | 0.44786800  |
| O  | -2.58732800 | -1.80552400 | 3.92318000  |
| O  | -3.77762800 | -2.24825600 | 3.54398500  |
| C  | -1.69828400 | -3.26186200 | -3.41168200 |
| C  | -2.95048600 | -2.75429900 | -3.05061000 |
| C  | -3.43292300 | -2.91799700 | -1.75361500 |
| C  | -2.67025500 | -3.58269400 | -0.78524900 |
| C  | -1.42882600 | -4.12928200 | -1.16773100 |
| C  | -0.94731500 | -3.96852800 | -2.47720900 |
| H  | -1.31998700 | -3.11896700 | -4.41920600 |
| H  | -3.55216900 | -2.22452500 | -3.78465100 |
| H  | -4.39616600 | -2.50404100 | -1.46570500 |
| H  | -0.87054500 | -4.73695900 | -0.45487400 |
| H  | 0.02096800  | -4.38125800 | -2.74540200 |
| C  | -3.14113200 | -3.65526600 | 0.64652700  |
| H  | -2.26133000 | -3.88565600 | 1.28195700  |
| H  | -3.82814400 | -4.51399600 | 0.75340800  |
| O  | -3.80851600 | -2.49835300 | 1.06277300  |
| H  | -3.77465800 | -2.33847800 | 2.51891200  |

## TS2

|    |             |             |             |
|----|-------------|-------------|-------------|
| Au | -1.37146000 | 0.95188000  | 1.38993500  |
| Au | -1.85931600 | -1.82718600 | 1.12188900  |
| Au | -1.61555400 | -0.19656800 | -1.40365300 |
| Au | -3.82478700 | 0.02686500  | 0.44563600  |
| Au | 0.70719800  | -3.03241400 | 1.49519700  |
| Au | 2.59901900  | -2.07253500 | -0.33345700 |
| Au | -0.29617200 | -2.66994900 | -1.11864400 |
| Au | 1.05307500  | -0.46396900 | -2.27453000 |

|    |             |             |             |
|----|-------------|-------------|-------------|
| Au | -2.59607700 | 2.34960900  | -0.87285500 |
| Au | 1.27213500  | 1.25856200  | 2.02518700  |
| Au | 3.02948600  | 0.61227400  | -0.58975300 |
| Au | 0.27063400  | 1.94412400  | -0.67166200 |
| Cu | 0.53136200  | -0.59585800 | 0.33870500  |
| O  | 2.97498500  | 1.73226700  | 3.30162000  |
| O  | 4.21538600  | 1.76141000  | 2.50141000  |
| C  | 0.30420100  | 5.23277900  | -0.05932700 |
| C  | 0.84756500  | 4.50955000  | -1.12873000 |
| C  | 2.08382300  | 3.85802500  | -0.98252400 |
| C  | 2.80637200  | 3.96340300  | 0.23083100  |
| C  | 2.25361800  | 4.71776700  | 1.27750600  |
| C  | 1.01366000  | 5.33273200  | 1.13670200  |
| H  | -0.66051800 | 5.71794700  | -0.17049500 |
| H  | 0.34180300  | 4.49620600  | -2.09115400 |
| H  | 2.55690300  | 3.36257700  | -1.82772100 |
| H  | 2.79631600  | 4.79743600  | 2.21747400  |
| H  | 0.59631200  | 5.89494100  | 1.96671000  |
| C  | 4.09581400  | 3.28329500  | 0.37640100  |
| H  | 4.07037500  | 2.51889800  | 1.61813200  |
| H  | 4.91337200  | 3.90375200  | 0.78853100  |
| O  | 4.46263800  | 2.34873700  | -0.47026000 |
| H  | 4.23529900  | 0.88881300  | 2.05892200  |

## Int2

|    |             |             |             |
|----|-------------|-------------|-------------|
| Au | 1.67532800  | -0.25588300 | 1.30078500  |
| Au | 0.28534500  | 2.22336100  | 1.08761000  |
| Au | 1.22652700  | 1.00602200  | -1.47915100 |
| Au | 3.01164400  | 2.14371500  | 0.35448500  |
| Au | -2.49136600 | 1.69433200  | 1.23170600  |
| Au | -3.31517800 | -0.15955600 | -0.71543800 |
| Au | -1.38353800 | 2.07799300  | -1.34747200 |
| Au | -0.96184400 | -0.44981200 | -2.53679000 |
| Au | 3.50055500  | -0.56068400 | -0.79532400 |
| Au | -0.64926100 | -0.26703500 | 2.65408300  |
| Au | -1.70916100 | -2.47540400 | -0.69239300 |
| Au | 1.05086900  | -1.91865800 | -1.01067900 |
| Cu | -0.74757000 | -0.09411300 | 0.06422600  |
| O  | -2.64861400 | -0.80341600 | 3.54544600  |
| O  | -3.40256300 | -1.53304700 | 2.47469800  |
| C  | 3.07169000  | -4.34091000 | 1.07106700  |
| C  | 1.92245700  | -4.73197200 | 0.38181200  |
| C  | 0.66525100  | -4.43153300 | 0.89932400  |
| C  | 0.55977500  | -3.73675500 | 2.11532000  |
| C  | 1.72291800  | -3.35659600 | 2.80539300  |
| C  | 2.97350000  | -3.65485200 | 2.28374700  |
| H  | 4.04997800  | -4.56667200 | 0.65684500  |
| H  | 2.00700800  | -5.26868200 | -0.55843700 |
| H  | -0.24293500 | -4.73616000 | 0.38434300  |
| H  | 1.62739500  | -2.79810600 | 3.73512400  |
| H  | 3.87159100  | -3.34493700 | 2.80856800  |
| C  | -0.72917900 | -3.33101300 | 2.63620400  |

|   |             |             |            |
|---|-------------|-------------|------------|
| H | -2.83875000 | -2.38130700 | 2.31299500 |
| H | -0.73474600 | -2.87478900 | 3.64359100 |
| O | -1.80073400 | -3.46907300 | 2.01462500 |
| H | -3.31697500 | -0.96688600 | 1.65667600 |

### TS<sub>0-OA</sub>

|    |             |             |             |
|----|-------------|-------------|-------------|
| Au | -1.66502000 | 0.44672100  | 1.27160800  |
| Au | -0.36779200 | -2.09417100 | 1.30065600  |
| Au | -1.26245700 | -1.14017100 | -1.38263200 |
| Au | -3.09507900 | -1.97952100 | 0.58711800  |
| Au | 2.42463600  | -1.60108500 | 1.42203000  |
| Au | 3.30957900  | -0.06575800 | -0.76276100 |
| Au | 1.31899200  | -2.28513400 | -1.11931000 |
| Au | 1.00605300  | 0.15146800  | -2.56604200 |
| Au | -3.50093700 | 0.55988000  | -0.86242300 |
| Au | 0.69311900  | 0.67581400  | 2.56003700  |
| Au | 1.78011000  | 2.30149000  | -0.83102700 |
| Au | -1.00259700 | 1.78241500  | -1.23026300 |
| Cu | 0.73433800  | 0.02752700  | 0.04125200  |
| O  | 2.48495900  | 1.40243600  | 3.49745200  |
| O  | 3.56964400  | 1.79260400  | 2.26492900  |
| C  | -2.97157500 | 4.28689200  | 0.75545200  |
| C  | -1.90110800 | 4.62400400  | -0.07620300 |
| C  | -0.59396400 | 4.48411400  | 0.38140000  |
| C  | -0.35691100 | 4.01141000  | 1.68191700  |
| C  | -1.44022200 | 3.69377300  | 2.51633000  |
| C  | -2.74259200 | 3.82310500  | 2.05196500  |
| H  | -3.98897700 | 4.37870000  | 0.38636600  |
| H  | -2.08794600 | 4.99280900  | -1.08065900 |
| H  | 0.25382000  | 4.74605300  | -0.24767400 |
| H  | -1.24224100 | 3.30545400  | 3.51418100  |
| H  | -3.57842900 | 3.55326300  | 2.68998600  |
| C  | 0.99043900  | 3.74258000  | 2.15135600  |
| H  | 3.10057500  | 2.61618400  | 1.92884000  |
| H  | 1.10194100  | 3.48042300  | 3.21878100  |
| O  | 1.99664300  | 3.76046200  | 1.41870900  |
| H  | 3.38098300  | 1.08563100  | 1.59965100  |

### Int<sub>0-OA</sub>

|    |             |             |             |
|----|-------------|-------------|-------------|
| Au | -1.54567500 | -0.14679800 | 1.59561500  |
| Au | -0.82390200 | -2.24546000 | -0.18100800 |
| Au | -1.73798500 | 0.21915000  | -1.47075000 |
| Au | -3.54029700 | -1.44273300 | -0.03889100 |
| Au | 2.18017900  | -2.19466900 | -0.33456600 |
| Au | 3.00465300  | 0.29903600  | -1.29894500 |
| Au | 0.66808800  | -1.09654600 | -2.37966400 |
| Au | 0.56085800  | 1.78519900  | -1.97982800 |
| Au | -3.54551900 | 1.43338000  | 0.47780100  |
| Au | 0.65523200  | -1.62683700 | 2.22561300  |
| Au | 2.00993900  | 2.34333200  | 0.31781300  |
| Au | -0.88426600 | 2.32298200  | 0.43896300  |

|    |            |             |            |
|----|------------|-------------|------------|
| Cu | 0.64584300 | 0.03137900  | 0.04701300 |
| O  | 2.07680700 | -2.58392200 | 3.36577200 |
| O  | 3.56614100 | -3.28689000 | 1.21384200 |
| C  | 1.85922300 | 3.29698900  | 3.45639200 |
| C  | 2.97285400 | 3.27174800  | 2.60012900 |
| C  | 3.63740100 | 2.05984800  | 2.35544500 |
| C  | 3.18935400 | 0.88417900  | 2.98553100 |
| C  | 2.09943000 | 0.93311200  | 3.86193300 |
| C  | 1.42808900 | 2.13327900  | 4.08632500 |
| H  | 1.34086200 | 4.23544500  | 3.63022400 |
| H  | 3.35106300 | 4.19566000  | 2.17012600 |
| H  | 4.52213000 | 2.01376500  | 1.72571900 |
| H  | 1.77750800 | 0.01255300  | 4.34786500 |
| H  | 0.56710600 | 2.15860300  | 4.74675200 |
| C  | 3.79414200 | -0.41455700 | 2.67075300 |
| H  | 4.26580800 | -2.61837200 | 1.31048700 |
| H  | 3.41659200 | -1.26547000 | 3.29463700 |
| O  | 4.60814500 | -0.60269400 | 1.77745000 |
| H  | 3.03477400 | -3.19448900 | 2.05525900 |

### Int3

|    |             |             |             |
|----|-------------|-------------|-------------|
| Au | -1.72941100 | 0.24063500  | 1.45158300  |
| Au | -0.70064600 | -2.31459700 | 0.80871800  |
| Au | -1.20087800 | -0.37863200 | -1.48576100 |
| Au | -3.31178900 | -1.57574700 | 0.12886900  |
| Au | 2.09898300  | -2.24786300 | 1.27574500  |
| Au | 3.39634800  | -0.26521000 | -0.30848500 |
| Au | 1.10283700  | -1.98121000 | -1.36936300 |
| Au | 1.30899200  | 0.73116800  | -2.08468000 |
| Au | -3.28863100 | 1.30869900  | -0.82388900 |
| Au | 0.36800100  | 1.70683000  | 2.39438200  |
| Au | 2.30803800  | 2.17918300  | 0.11956200  |
| Au | -0.71579800 | 2.27115000  | -0.36630400 |
| Cu | 0.78744200  | -0.05714500 | 0.44274700  |
| O  | 0.73958200  | 3.42239500  | 0.95881400  |

### Int4

|    |             |             |             |
|----|-------------|-------------|-------------|
| Au | -1.51552500 | 0.62284300  | 1.58271300  |
| Au | -1.08404000 | -2.09209600 | 1.10681000  |
| Au | -1.84958900 | -0.42300400 | -1.29843000 |
| Au | -3.65033000 | -1.03588500 | 0.92599000  |
| Au | 1.75787600  | -1.87775400 | 1.22162100  |
| Au | 2.88330700  | -0.92972600 | -1.28942300 |
| Au | 0.27997000  | -2.38695000 | -1.33393500 |
| Au | 0.52877700  | 0.12241800  | -2.70258500 |
| Au | -3.28762500 | 1.76494700  | -0.41105300 |
| Au | 1.14986500  | 0.97949100  | 2.09878800  |
| Au | 2.27282800  | 1.69876100  | -1.03409500 |
| Au | -0.59017400 | 2.38733100  | -0.48597700 |
| Cu | 0.48214100  | -0.08508900 | -0.12235000 |
| O  | 1.25519400  | 3.39835200  | -0.35109500 |

|   |            |             |            |
|---|------------|-------------|------------|
| C | 4.93801600 | -0.40331200 | 1.53132500 |
| C | 4.67353600 | 0.94358200  | 1.29177300 |
| C | 3.93056700 | 1.69888500  | 2.20244700 |
| C | 3.47362700 | 1.07745200  | 3.38229500 |
| C | 3.73830900 | -0.27551700 | 3.62183600 |
| C | 4.46191600 | -1.02010000 | 2.68983100 |
| H | 5.49486000 | -0.98090600 | 0.79794900 |
| H | 5.01901500 | 1.41022200  | 0.37057600 |
| H | 2.95080100 | 1.67434600  | 4.12828300 |
| H | 3.38141100 | -0.74060000 | 4.53632900 |
| H | 4.67058800 | -2.07038700 | 2.87452800 |
| C | 3.56075500 | 3.13450200  | 1.93252500 |
| H | 3.86181400 | 3.40703200  | 0.91048500 |
| H | 4.10272800 | 3.79617000  | 2.62237000 |
| O | 2.16773900 | 3.34893700  | 2.11878600 |
| H | 1.76118800 | 3.46079000  | 1.20042800 |

### TS3

|    |             |             |             |
|----|-------------|-------------|-------------|
| Au | -1.57787800 | 0.62924100  | 1.56078400  |
| Au | -1.09798100 | -2.06705000 | 1.14418100  |
| Au | -1.84290200 | -0.47252200 | -1.30895000 |
| Au | -3.68991000 | -1.04895300 | 0.85613000  |
| Au | 1.72581100  | -1.74533600 | 1.35369200  |
| Au | 2.87652700  | -0.99507200 | -1.25764100 |
| Au | 0.29909200  | -2.42715000 | -1.24462800 |
| Au | 0.53348900  | 0.04340300  | -2.70005300 |
| Au | -3.20765300 | 1.79811700  | -0.48762800 |
| Au | 1.04009700  | 1.19027400  | 2.04401200  |
| Au | 2.31195200  | 1.63818200  | -1.07838300 |
| Au | -0.51363300 | 2.42047900  | -0.45572500 |
| Cu | 0.46739000  | -0.07309900 | -0.11724500 |
| O  | 1.41866600  | 3.40188900  | -0.33318100 |
| C  | 4.92346400  | -0.62586300 | 1.48498200  |
| C  | 4.72660500  | 0.73565600  | 1.26124000  |
| C  | 4.00685900  | 1.51535700  | 2.16986500  |
| C  | 3.51488400  | 0.90584900  | 3.33723600  |
| C  | 3.69912200  | -0.46009100 | 3.56127600  |
| C  | 4.39543000  | -1.23406100 | 2.62674400  |
| H  | 5.46781400  | -1.21964600 | 0.75512000  |
| H  | 5.10938100  | 1.19590200  | 0.35169200  |
| H  | 2.99654900  | 1.51482900  | 4.07655700  |
| H  | 3.31180600  | -0.91727300 | 4.46766400  |
| H  | 4.55559300  | -2.29419800 | 2.80570000  |
| C  | 3.67203900  | 2.95841800  | 1.88833400  |
| H  | 4.06425800  | 3.23114000  | 0.89489800  |
| H  | 4.17195900  | 3.60770500  | 2.62294700  |
| O  | 2.27708800  | 3.19149300  | 1.94863200  |
| H  | 1.86806600  | 3.35740900  | 0.88635900  |

### Int5

|    |             |             |            |
|----|-------------|-------------|------------|
| Au | -1.52666100 | 0.03434300  | 1.65662500 |
| Au | -0.91707300 | -2.41247500 | 0.38403800 |

|    |             |             |             |
|----|-------------|-------------|-------------|
| Au | -1.75756400 | -0.20245200 | -1.40140800 |
| Au | -3.57173600 | -1.54247800 | 0.37943500  |
| Au | 1.86536400  | -2.17575400 | 0.66172700  |
| Au | 3.02134900  | -0.04351000 | -1.08416800 |
| Au | 0.65014900  | -1.78930100 | -1.87042400 |
| Au | 0.50053900  | 0.97105800  | -2.47552800 |
| Au | -3.52949300 | 1.35844300  | 0.14064900  |
| Au | 0.91020500  | 1.10878300  | 2.32155000  |
| Au | 2.00795700  | 2.35324500  | -0.47026200 |
| Au | -0.87080900 | 2.34464500  | 0.20664300  |
| Cu | 0.55088700  | 0.03295600  | -0.00617500 |
| O  | 0.64879600  | 4.05123000  | -0.05767000 |
| C  | 5.32735700  | -1.78350800 | 0.91728000  |
| C  | 5.09724000  | -0.45488300 | 1.27424300  |
| C  | 4.12037500  | -0.11038400 | 2.21898800  |
| C  | 3.38745800  | -1.13236000 | 2.82344400  |
| C  | 3.59547000  | -2.47837000 | 2.45773000  |
| C  | 4.57328500  | -2.80315900 | 1.49776500  |
| H  | 6.08605100  | -2.02352600 | 0.17798900  |
| H  | 5.67936000  | 0.33803900  | 0.80595300  |
| H  | 2.64750400  | -0.86626400 | 3.57419100  |
| H  | 3.07526700  | -3.27103700 | 2.99126100  |
| H  | 4.74590700  | -3.84108300 | 1.23002100  |
| C  | 3.84201500  | 1.33993800  | 2.54819600  |
| H  | 3.84990600  | 1.89275300  | 1.57741800  |
| H  | 4.71750100  | 1.73302100  | 3.10136200  |
| O  | 2.71736000  | 1.56836500  | 3.30467100  |
| H  | 0.83848600  | 4.30281200  | 0.85774500  |

## TS4

|    |             |             |             |
|----|-------------|-------------|-------------|
| Au | -1.15049000 | -1.59478400 | 1.40987700  |
| Au | -0.86606400 | -1.68057600 | -1.45654100 |
| Au | -2.60761100 | 0.35944000  | -0.24298000 |
| Au | -3.35569600 | -2.28390100 | -0.26758300 |
| Au | 1.63939500  | -0.44392500 | -2.08683400 |
| Au | 0.81899400  | 2.76841000  | 0.18998900  |
| Au | -0.58902700 | 1.19879500  | -2.13832500 |
| Au | -1.87368300 | 3.07577700  | -0.19752500 |
| Au | -1.00867700 | 1.22974800  | 2.03987000  |
| Au | 1.25501700  | -2.48004300 | 0.18706300  |
| Au | 2.85253300  | 1.06148500  | 0.27166600  |
| Au | 1.21105400  | -0.33415400 | 2.47394300  |
| Cu | 0.28721700  | 0.16491300  | 0.06507800  |
| O  | 3.25583600  | -1.02751100 | 2.91634100  |
| C  | 5.35533000  | 0.71009300  | -1.07558300 |
| C  | 5.08433300  | -0.18046800 | -0.01887600 |
| C  | 4.42388600  | -1.40544200 | -0.25833500 |
| C  | 4.00149700  | -1.68607100 | -1.57726700 |
| C  | 4.27050600  | -0.78846900 | -2.62455100 |
| C  | 4.95218200  | 0.41007400  | -2.37397200 |
| H  | 5.88764500  | 1.63399600  | -0.86844800 |
| H  | 5.46166600  | 0.02971500  | 0.98150400  |

|   |            |             |             |
|---|------------|-------------|-------------|
| H | 3.55006300 | -2.65661700 | -1.77129500 |
| H | 4.01845200 | -1.06517300 | -3.64637200 |
| H | 5.16367300 | 1.09785000  | -3.18586500 |
| C | 4.15762400 | -2.37046900 | 0.83828600  |
| H | 3.71836500 | -1.68172200 | 1.83269000  |
| H | 5.08693700 | -2.70982900 | 1.33649700  |
| O | 3.29711600 | -3.35104300 | 0.58507500  |
| H | 3.15419700 | -1.76308900 | 3.53744000  |

## Int6

|    |             |             |             |
|----|-------------|-------------|-------------|
| Au | -1.55354200 | 0.11375600  | 1.67903700  |
| Au | -0.80205200 | -2.40614500 | 0.49786200  |
| Au | -1.76912200 | -0.25834600 | -1.36221600 |
| Au | -3.46528700 | -1.54051300 | 0.60150600  |
| Au | 1.98745500  | -2.42735300 | 0.25996800  |
| Au | 2.97988400  | -0.16310300 | -1.14175100 |
| Au | 0.53856400  | -1.72071200 | -2.03402100 |
| Au | 0.54030900  | 1.07596500  | -2.35136300 |
| Au | -3.55886000 | 1.40271800  | 0.06000700  |
| Au | 0.74157600  | 1.41293800  | 2.24637400  |
| Au | 1.97953200  | 2.35153800  | -0.35386200 |
| Au | -0.88957800 | 2.26055000  | -0.13262500 |
| Cu | 0.62210300  | -0.06638300 | 0.06399200  |
| O  | 3.11475300  | 4.09951600  | 0.96598800  |
| C  | 4.62113900  | -2.53774600 | 2.03488500  |
| C  | 4.81364200  | -1.16627600 | 1.95771800  |
| C  | 3.92226600  | -0.29146300 | 2.59783700  |
| C  | 2.85916600  | -0.80617100 | 3.36296600  |
| C  | 2.65001800  | -2.17493200 | 3.41728800  |
| C  | 3.51776600  | -3.04090600 | 2.73666900  |
| H  | 5.29698900  | -3.21735500 | 1.52596600  |
| H  | 5.63065100  | -0.75438200 | 1.36875800  |
| H  | 2.20224300  | -0.11914300 | 3.89171800  |
| H  | 1.80699500  | -2.57663200 | 3.97112200  |
| H  | 3.35130500  | -4.11361600 | 2.78179000  |
| C  | 4.06564400  | 1.13211300  | 2.37772200  |
| H  | 4.93628000  | 1.42866500  | 1.75296100  |
| O  | 3.28585400  | 2.00049600  | 2.79142600  |
| H  | 3.26708900  | 3.55778800  | 1.76557500  |
| H  | 3.98334600  | 4.22977300  | 0.57215800  |

## Cu<sub>12</sub>Au Cluster

|    |             |             |             |
|----|-------------|-------------|-------------|
| Au | 2.87007600  | -0.86407600 | -0.14755100 |
| Cu | 0.64598100  | 0.26296900  | -0.90807600 |
| Cu | -1.28618200 | -1.17410500 | -1.51612800 |
| Cu | 0.45809500  | -2.06098100 | 0.09753100  |
| Cu | -2.03927500 | -2.65125200 | 0.30516600  |
| Cu | 2.19784500  | 1.74261400  | 0.32750200  |
| Cu | -2.79387600 | 1.49183500  | 1.05622300  |
| Cu | -1.25518200 | -0.43171200 | 0.96033900  |

|    |             |             |             |
|----|-------------|-------------|-------------|
| Cu | -0.27614700 | 1.86598700  | 1.00283400  |
| Cu | 1.10072200  | -0.10088800 | 1.61847900  |
| Cu | -3.36622600 | -0.55774000 | -0.30702900 |
| Cu | 0.43983000  | 2.72590000  | -1.15552600 |
| Cu | -1.64406800 | 1.24123600  | -1.07936400 |

### **Cu<sub>12</sub>Au-O<sub>2</sub>**

|    |             |             |             |
|----|-------------|-------------|-------------|
| Au | -3.01386200 | -0.70659900 | 0.08122100  |
| Cu | -0.75076900 | 0.26276400  | 0.87666700  |
| Cu | 1.28432300  | -1.03480800 | 1.57422000  |
| Cu | -0.67462300 | -2.06093200 | 0.02466400  |
| Cu | 1.75598900  | -2.78634900 | 0.00419800  |
| Cu | -2.05568500 | 1.87079900  | -0.40138500 |
| Cu | 2.75529800  | 1.06348400  | -1.59347200 |
| Cu | 1.11788100  | -0.64312900 | -1.01208800 |
| Cu | 0.32215000  | 1.72567800  | -1.17424300 |
| Cu | -1.18918700 | -0.18268000 | -1.67517000 |
| Cu | 3.33751500  | -0.81471300 | 0.04584100  |
| Cu | -0.14912300 | 2.64111000  | 1.08150900  |
| Cu | 2.02459300  | 1.27884700  | 0.67211200  |
| O  | 0.40556700  | 0.42692300  | 2.54527300  |
| O  | 1.15976200  | 1.76548300  | 2.36983200  |

### **Ads**

|    |             |             |             |
|----|-------------|-------------|-------------|
| Au | 2.51580500  | 1.78145000  | -0.24592600 |
| Cu | 0.82866200  | 0.06397900  | 0.76616400  |
| Cu | -1.66452300 | 0.16712500  | 0.92974400  |
| Cu | -0.13851300 | 1.62386000  | -0.86865900 |
| Cu | -2.62974400 | 0.91200300  | -1.17258100 |
| Cu | 3.02175100  | -0.90263400 | 0.24032400  |
| Cu | -1.17768000 | -3.14712300 | -1.29000700 |
| Cu | -0.78188900 | -0.74442500 | -1.32060400 |
| Cu | 1.08326600  | -2.25568700 | -0.56347300 |
| Cu | 1.54579000  | -0.11327500 | -1.73015800 |
| Cu | -2.94325100 | -1.50545900 | -0.51160300 |
| Cu | 1.46390900  | -2.00149400 | 1.89890900  |
| Cu | -0.94924600 | -2.24665000 | 0.95849800  |
| O  | -0.38117300 | -0.08773400 | 2.44976000  |
| O  | -0.34197700 | -1.59703400 | 2.76510900  |
| C  | -3.46732600 | 2.67102300  | 0.48824600  |
| C  | -2.38711800 | 2.71530700  | 1.39237700  |
| C  | -1.16569800 | 3.24199300  | 0.95701200  |
| C  | -1.00480600 | 3.68749200  | -0.36733900 |
| C  | -2.07392500 | 3.59458100  | -1.27580200 |
| C  | -3.31888000 | 3.10999800  | -0.83565300 |
| H  | -4.43092300 | 2.29540400  | 0.82666600  |
| H  | -0.34270100 | 3.28793700  | 1.66609700  |
| H  | -0.06848300 | 4.15134200  | -0.67263000 |
| H  | -1.95514700 | 3.94433300  | -2.29676900 |
| H  | -4.17323600 | 3.11152800  | -1.50859800 |
| C  | -2.55664300 | 2.22726100  | 2.81913700  |

|   |             |            |            |
|---|-------------|------------|------------|
| H | -3.24139400 | 2.91408200 | 3.33831200 |
| H | -3.07829500 | 1.24998800 | 2.79195200 |
| O | -1.37084800 | 2.16950800 | 3.54363500 |
| H | -0.95752600 | 1.29057100 | 3.38719100 |

## TS1

|    |             |             |             |
|----|-------------|-------------|-------------|
| Au | 2.43510400  | 1.79784100  | -0.25328100 |
| Cu | 0.81459500  | -0.03549700 | 0.76103200  |
| Cu | -1.77169300 | 0.20070100  | 1.07758200  |
| Cu | -0.28966900 | 1.68051100  | -0.65509400 |
| Cu | -2.78728200 | 0.95562600  | -1.03153100 |
| Cu | 3.00163500  | -0.88313300 | -0.13590000 |
| Cu | -1.35031700 | -3.05143900 | -1.27635400 |
| Cu | -0.95073200 | -0.65526600 | -1.22442900 |
| Cu | 0.98840300  | -2.20935100 | -0.85023600 |
| Cu | 1.29471000  | 0.06358200  | -1.80210900 |
| Cu | -3.03450700 | -1.46552100 | -0.28947900 |
| Cu | 1.75104700  | -2.25110800 | 1.49038900  |
| Cu | -0.85043800 | -2.14634100 | 0.97776800  |
| O  | 0.59290800  | -0.50121800 | 2.76037100  |
| O  | 0.14692100  | -1.94442300 | 2.69493000  |
| C  | -2.89336500 | 2.64913000  | 1.33577400  |
| C  | -1.52258200 | 2.84789700  | 1.55504600  |
| C  | -0.77660400 | 3.54985900  | 0.58424400  |
| C  | -1.36653500 | 3.91781100  | -0.63463900 |
| C  | -2.73442000 | 3.67341000  | -0.85639100 |
| C  | -3.50566500 | 3.09069300  | 0.15288800  |
| H  | -3.47227200 | 2.12317500  | 2.09111700  |
| H  | 0.27112900  | 3.77726800  | 0.77574500  |
| H  | -0.77337200 | 4.42576900  | -1.39015200 |
| H  | -3.19379700 | 3.98475300  | -1.78991700 |
| H  | -4.57477800 | 2.95345700  | 0.01441000  |
| C  | -0.85312600 | 2.22503200  | 2.75648600  |
| H  | 0.23326700  | 2.18068500  | 2.56468900  |
| H  | -1.00425700 | 2.84534000  | 3.65244700  |
| O  | -1.37636900 | 0.92658100  | 2.98059800  |
| H  | -0.50981800 | 0.22946900  | 3.03567500  |

## Int1

|    |             |             |             |
|----|-------------|-------------|-------------|
| Au | 2.10928700  | 2.15997500  | -0.18660700 |
| Cu | 0.83387300  | 0.05415900  | 0.77044100  |
| Cu | -1.75339400 | -0.10294700 | 1.15345900  |
| Cu | -0.55528300 | 1.62211600  | -0.58542000 |
| Cu | -2.92296400 | 0.52869600  | -0.92595000 |
| Cu | 3.10511400  | -0.37615500 | -0.21696400 |
| Cu | -0.85079100 | -3.20817900 | -1.28871200 |
| Cu | -0.85381600 | -0.77007800 | -1.19967500 |
| Cu | 1.31542300  | -1.98558400 | -0.94801600 |
| Cu | 1.23126400  | 0.33340400  | -1.81344900 |
| Cu | -2.75022400 | -1.92565700 | -0.24329100 |
| Cu | 2.16688400  | -2.01316100 | 1.35919600  |
| Cu | -0.44127100 | -2.26083300 | 0.95837000  |

|   |             |             |             |
|---|-------------|-------------|-------------|
| O | 0.75573400  | -0.49654300 | 2.86044300  |
| O | 0.61293600  | -1.98866800 | 2.69718700  |
| C | -3.35297700 | 2.14442900  | 1.24193500  |
| C | -2.04253200 | 2.59606300  | 1.46677700  |
| C | -1.43757500 | 3.41338600  | 0.48794700  |
| C | -2.07033200 | 3.63018300  | -0.74875000 |
| C | -3.36395000 | 3.12939000  | -0.97600000 |
| C | -4.02982600 | 2.44313700  | 0.04955000  |
| H | -3.82039600 | 1.52885900  | 2.00652600  |
| H | -0.45804700 | 3.84825300  | 0.68575800  |
| H | -1.57030600 | 4.21468300  | -1.51614300 |
| H | -3.86172700 | 3.32418600  | -1.92127300 |
| H | -5.06040200 | 2.12397200  | -0.08523700 |
| C | -1.27875700 | 2.07357800  | 2.67179100  |
| H | -0.19783400 | 2.24183100  | 2.46625300  |
| H | -1.52135900 | 2.68768800  | 3.55876200  |
| O | -1.58553900 | 0.73738200  | 2.90656400  |
| H | -0.17260100 | -0.18342300 | 3.09452600  |

### TS<sub>o-oc</sub>

|    |             |             |             |
|----|-------------|-------------|-------------|
| Au | 2.04371300  | 2.22848500  | -0.19758100 |
| Cu | 0.85970600  | 0.08067800  | 0.79694700  |
| Cu | -1.71389300 | -0.16404600 | 1.22354600  |
| Cu | -0.59783100 | 1.60028800  | -0.56380800 |
| Cu | -2.94079700 | 0.43475100  | -0.82897100 |
| Cu | 3.13614600  | -0.30472200 | -0.23766800 |
| Cu | -0.77468300 | -3.23359600 | -1.31249900 |
| Cu | -0.84546800 | -0.80347200 | -1.17434300 |
| Cu | 1.36967500  | -1.97385800 | -0.94919000 |
| Cu | 1.21710100  | 0.34268000  | -1.76873300 |
| Cu | -2.68549100 | -2.02017600 | -0.18201800 |
| Cu | 2.22988800  | -1.95766300 | 1.35286900  |
| Cu | -0.38443200 | -2.32135800 | 0.95170100  |
| O  | 0.86459100  | -0.23920200 | 2.84051000  |
| O  | 0.67608800  | -1.97109200 | 2.55513400  |
| C  | -3.45058600 | 2.07761600  | 1.13714900  |
| C  | -2.16450700 | 2.60317900  | 1.35509400  |
| C  | -1.59163800 | 3.41125500  | 0.35067200  |
| C  | -2.21989700 | 3.54699200  | -0.89977800 |
| C  | -3.48198600 | 2.97363700  | -1.12015000 |
| C  | -4.12825500 | 2.29535300  | -0.07274100 |
| H  | -3.89447900 | 1.47232500  | 1.92371800  |
| H  | -0.63811700 | 3.90365400  | 0.54099400  |
| H  | -1.73770600 | 4.11870700  | -1.68767600 |
| H  | -3.97723800 | 3.10244100  | -2.07773200 |
| H  | -5.14455100 | 1.93078300  | -0.20190200 |
| C  | -1.38870500 | 2.17297700  | 2.58731600  |
| H  | -0.31672500 | 2.39260000  | 2.38525400  |
| H  | -1.67550100 | 2.81622800  | 3.44092800  |
| O  | -1.62509500 | 0.83874100  | 2.88321600  |
| H  | -0.06794500 | -0.00633400 | 3.10186400  |

## Intro-oc

|    |             |             |             |
|----|-------------|-------------|-------------|
| Au | 1.98944500  | 2.21231400  | -0.39145600 |
| Cu | 0.73535500  | -0.01697000 | 0.81713000  |
| Cu | -1.75006000 | -0.03487900 | 1.28592000  |
| Cu | -0.58617100 | 1.62369300  | -0.64500800 |
| Cu | -2.93149900 | 0.74694900  | -0.74119100 |
| Cu | 2.98950700  | -0.20930900 | -0.15084000 |
| Cu | -1.26462100 | -3.16206500 | -1.26960900 |
| Cu | -1.05446600 | -0.75070700 | -1.18179400 |
| Cu | 1.03018800  | -2.10059000 | -0.77402400 |
| Cu | 1.12359600  | 0.13416100  | -1.79033400 |
| Cu | -2.93281400 | -1.77624600 | 0.01541000  |
| Cu | 2.31452700  | -2.11756600 | 1.38857700  |
| Cu | -0.73097700 | -2.31258100 | 1.06822900  |
| O  | 3.90011500  | -1.07313900 | 1.38687800  |
| O  | 0.93893100  | -3.22397800 | 0.89060200  |
| C  | -2.80727400 | 2.22336100  | 1.84305800  |
| C  | -1.51099000 | 2.72251400  | 1.63259300  |
| C  | -1.28899400 | 3.56222100  | 0.52420300  |
| C  | -2.31977000 | 3.82250500  | -0.39284500 |
| C  | -3.59135000 | 3.27515400  | -0.19790100 |
| C  | -3.84523700 | 2.49841300  | 0.94250000  |
| H  | -3.00038500 | 1.61355100  | 2.72578200  |
| H  | -0.30894000 | 4.02043400  | 0.39415300  |
| H  | -2.12539100 | 4.44977100  | -1.25761300 |
| H  | -4.39009300 | 3.49047900  | -0.90154600 |
| H  | -4.84562200 | 2.12224400  | 1.13690600  |
| C  | -0.37781500 | 2.21624400  | 2.49524200  |
| H  | 0.55359100  | 2.72977400  | 2.19612200  |
| H  | -0.57092400 | 2.47019000  | 3.55096100  |
| O  | -0.25570800 | 0.81867700  | 2.37545800  |
| H  | 3.96910400  | -0.45693100 | 2.12414600  |

## TS2

|    |             |             |             |
|----|-------------|-------------|-------------|
| Au | 3.41571800  | -0.51842000 | 0.20142700  |
| Cu | 1.46442300  | 0.96133400  | -0.62269700 |
| Cu | -2.48042700 | 1.22838500  | 0.69535800  |
| Cu | -0.01309100 | 0.04211600  | -2.53513600 |
| Cu | -0.77582500 | 2.01726400  | -1.17231500 |
| Cu | 1.10997900  | -0.57389500 | 1.45039500  |
| Cu | -1.18878500 | -2.00883900 | -1.77741200 |
| Cu | -0.68597100 | -0.17269600 | -0.14790500 |
| Cu | -0.62814000 | -2.54244800 | 0.63082600  |
| Cu | 1.20080200  | -1.60031900 | -0.85710200 |
| Cu | -2.50826000 | 0.18674500  | -1.73013300 |
| Cu | -1.36741700 | -0.82265100 | 2.36169200  |
| Cu | -2.87494800 | -1.28612400 | 0.25877200  |
| O  | 0.03299700  | 0.43418300  | 3.05459300  |
| O  | -2.23613900 | -2.36370800 | 1.74085300  |
| C  | -0.77389500 | 3.82919900  | 0.17584200  |
| C  | -0.13751500 | 3.25392400  | 1.30867700  |
| C  | 1.24635400  | 3.02203900  | 1.24142900  |

|   |             |            |             |
|---|-------------|------------|-------------|
| C | 1.97679600  | 3.30513700 | 0.07854200  |
| C | 1.33842300  | 3.86069900 | -1.03972800 |
| C | -0.03559900 | 4.15375600 | -0.97827800 |
| H | -1.82912100 | 4.08003600 | 0.25400000  |
| H | 1.75565100  | 2.56839800 | 2.09051200  |
| H | 3.04540400  | 3.10530000 | 0.05281100  |
| H | 1.90218100  | 4.07732600 | -1.94101000 |
| H | -0.52081100 | 4.66127000 | -1.80847000 |
| C | -0.96233700 | 2.77072000 | 2.43095400  |
| H | -0.37555600 | 1.52709300 | 2.78364100  |
| H | -0.74417900 | 3.23563600 | 3.40961900  |
| O | -2.23974700 | 2.51378300 | 2.18785500  |
| H | 0.23660900  | 0.41597700 | 3.99913500  |

## Int2

|    |             |             |             |
|----|-------------|-------------|-------------|
| Au | 1.62387500  | 2.60320700  | 0.23984700  |
| Cu | 0.98472000  | 0.19569300  | 0.88078400  |
| Cu | -1.19118900 | -0.79666500 | 1.51435000  |
| Cu | -0.83919500 | 1.45711800  | -0.21261100 |
| Cu | -2.77957900 | -0.26915800 | -0.32348500 |
| Cu | 3.25643900  | 0.38694600  | -0.11291800 |
| Cu | 0.10674600  | -3.19661700 | -1.63886700 |
| Cu | -0.50565000 | -0.86825800 | -1.09008600 |
| Cu | 1.93835100  | -1.51625000 | -1.06617200 |
| Cu | 1.20680900  | 0.79817800  | -1.61061100 |
| Cu | -1.97304500 | -2.60119100 | -0.20532500 |
| Cu | 2.61308300  | -1.50766800 | 1.36783200  |
| Cu | 0.37466200  | -2.58407800 | 0.67100500  |
| O  | -2.38640400 | 0.02004400  | 3.00869000  |
| O  | 0.72314900  | -1.40587500 | 2.16478500  |
| C  | -4.17276000 | 1.80326300  | -1.46212900 |
| C  | -3.99872300 | 1.55227300  | -0.07346400 |
| C  | -2.94939900 | 2.24975300  | 0.61482400  |
| C  | -2.18956900 | 3.22098300  | -0.06660800 |
| C  | -2.35730600 | 3.40820400  | -1.44645400 |
| C  | -3.34978600 | 2.68703300  | -2.13597600 |
| H  | -4.96223000 | 1.27178600  | -1.99010300 |
| H  | -2.84958900 | 2.12510300  | 1.68939500  |
| H  | -1.48536500 | 3.83693400  | 0.48831300  |
| H  | -1.73570300 | 4.12747800  | -1.97006900 |
| H  | -3.48248100 | 2.84154300  | -3.20223200 |
| C  | -4.86917900 | 0.62361100  | 0.63096700  |
| H  | -5.69417600 | 0.20502800  | 0.02130100  |
| O  | -4.78409800 | 0.33969400  | 1.84466700  |
| H  | -2.43812600 | -0.54561800 | 3.78529800  |
| H  | -3.31169800 | 0.13931900  | 2.67517600  |

## Int3

|    |             |             |             |
|----|-------------|-------------|-------------|
| Au | 3.40708900  | 0.06642800  | -0.10909900 |
| Cu | 1.37409200  | -1.37033200 | -0.73284900 |
| Cu | -2.64347100 | -0.44296800 | -1.65183900 |
| Cu | -0.12196900 | -2.01380200 | 1.18322300  |

|    |             |             |             |
|----|-------------|-------------|-------------|
| Cu | -0.99864100 | -2.30075000 | -1.20351700 |
| Cu | 1.22772300  | 1.19376500  | -1.04464100 |
| Cu | -1.14234400 | 0.05292000  | 2.15542000  |
| Cu | -0.66233000 | -0.11490800 | -0.30720200 |
| Cu | -0.42945700 | 2.11857100  | 0.92240400  |
| Cu | 1.25224300  | 0.27274900  | 1.36096600  |
| Cu | -2.59433400 | -1.39404800 | 0.67537900  |
| Cu | -1.19515700 | 1.92830100  | -1.49284500 |
| Cu | -2.79074100 | 1.11140000  | 0.42735200  |
| O  | -2.01910400 | 2.82077000  | 0.01938700  |

#### Int4

|    |             |             |             |
|----|-------------|-------------|-------------|
| Au | -1.59718700 | -2.49304300 | 0.31355200  |
| Cu | -0.55538400 | -0.13259700 | 0.52270800  |
| Cu | 1.67549100  | 0.12751300  | 1.78780600  |
| Cu | 1.05680100  | -2.11643700 | 0.68663100  |
| Cu | 3.44642200  | -1.23294500 | 0.94807900  |
| Cu | -2.12858600 | -0.40994500 | -1.37333400 |
| Cu | 2.29668400  | 1.89725800  | -1.82234800 |
| Cu | 1.96787100  | -0.35117700 | -0.83811600 |
| Cu | 0.02996800  | 0.78365600  | -1.94963600 |
| Cu | 0.03533200  | -1.66111200 | -1.56782100 |
| Cu | 3.41086600  | 1.23699400  | 0.33433600  |
| Cu | -1.61385500 | 1.93025300  | -0.56547200 |
| Cu | 0.89765000  | 1.97965100  | 0.14553500  |
| O  | 0.12162900  | 1.23220100  | 1.78065700  |
| C  | -4.01976200 | 0.53722300  | 0.96332800  |
| C  | -3.15061000 | 1.31082500  | 1.73289300  |
| C  | -2.83051900 | 2.62248500  | 1.35288700  |
| C  | -3.36596200 | 3.12464200  | 0.14293900  |
| C  | -4.23899200 | 2.33832700  | -0.62969600 |
| C  | -4.57158700 | 1.04750500  | -0.21556100 |
| H  | -4.25062700 | -0.47832000 | 1.27483700  |
| H  | -2.69730600 | 0.91787400  | 2.63841200  |
| H  | -3.15704200 | 4.15291400  | -0.14956400 |
| H  | -4.64758100 | 2.74044200  | -1.55195600 |
| H  | -5.24804800 | 0.44172400  | -0.81180200 |
| C  | -1.93185700 | 3.48732400  | 2.21334500  |
| H  | -1.18227300 | 3.96222600  | 1.54834400  |
| H  | -2.53752800 | 4.30868000  | 2.62211500  |
| O  | -1.34692800 | 2.82104800  | 3.27939100  |
| H  | -0.70223300 | 2.18658500  | 2.87512500  |

#### TS3

|   |            |             |             |
|---|------------|-------------|-------------|
| O | 1.17137600 | 3.05797200  | -1.39521900 |
| C | 3.22965200 | -2.87515400 | -1.28369600 |
| C | 2.68575500 | -1.80926500 | -2.02071900 |
| C | 3.24690600 | -0.52496300 | -1.95274400 |
| C | 4.37026600 | -0.32823000 | -1.13553000 |
| C | 4.91410600 | -1.37701300 | -0.39908100 |
| C | 4.34136800 | -2.65379000 | -0.45447800 |
| H | 2.80819600 | -3.87282200 | -1.38224600 |

|    |             |             |             |
|----|-------------|-------------|-------------|
| H  | 1.81250400  | -1.97938300 | -2.64808900 |
| H  | 4.78764200  | 0.67389000  | -1.08047500 |
| H  | 5.77984200  | -1.20307500 | 0.23372400  |
| H  | 4.77133400  | -3.47623400 | 0.10960300  |
| C  | 2.63083000  | 0.62231400  | -2.71682400 |
| H  | 1.51909900  | 0.51552200  | -2.63341700 |
| H  | 2.85827200  | 0.49612600  | -3.79137800 |
| O  | 3.04846200  | 1.86117300  | -2.25251300 |
| H  | 2.13033700  | 2.52784400  | -2.11054100 |
| Au | -3.12955800 | -1.36749300 | -0.24885300 |
| Cu | -1.39762000 | 0.18269900  | 0.93287500  |
| Cu | 0.55210400  | -0.88509400 | 2.10373100  |
| Cu | -0.56334600 | -2.04401300 | 0.21002800  |
| Cu | 2.04772200  | -2.12389600 | 0.56460200  |
| Cu | -2.78918600 | 1.29239400  | -0.79979600 |
| Cu | 2.24049100  | 2.06133300  | -0.09639700 |
| Cu | 0.96030200  | -0.09764100 | -0.28583800 |
| Cu | -0.31878800 | 2.00899400  | -0.97009200 |
| Cu | -1.10206900 | -0.32640200 | -1.59453300 |
| Cu | 2.71967600  | 0.21053800  | 1.49873300  |
| Cu | -1.70947700 | 2.57126200  | 1.02465200  |
| Cu | 0.54970400  | 1.58684300  | 1.61625800  |

## Int5

|    |             |             |             |
|----|-------------|-------------|-------------|
| Au | -0.52215700 | -3.01619200 | 0.01423300  |
| Cu | -0.41960500 | -0.43856400 | 0.85957500  |
| Cu | 1.92487000  | 0.29419500  | 1.76428300  |
| Cu | 1.71382800  | -1.75271700 | 0.27378200  |
| Cu | 3.77504800  | -0.28513400 | 0.38462900  |
| Cu | -2.07941900 | -0.83877900 | -0.90438200 |
| Cu | 1.43319800  | 2.73930000  | -1.47059100 |
| Cu | 1.84860200  | 0.39048000  | -0.97268100 |
| Cu | -0.45543000 | 1.04539500  | -1.52785700 |
| Cu | 0.24228900  | -1.28268300 | -1.76023300 |
| Cu | 2.98260300  | 2.12980500  | 0.34633000  |
| Cu | -2.02835000 | 1.52172100  | 0.23891300  |
| Cu | 0.37167100  | 2.11430700  | 0.62666900  |
| O  | 0.18956100  | 0.97046100  | 2.36378900  |
| C  | -5.12264200 | 1.69985200  | -0.81764100 |
| C  | -4.72381800 | 0.59276400  | -0.07589000 |
| C  | -4.02982400 | 0.74388900  | 1.13949500  |
| C  | -3.72187200 | 2.05040600  | 1.57614400  |
| C  | -4.10387800 | 3.16650700  | 0.80688600  |
| C  | -4.80635100 | 2.99002200  | -0.38118500 |
| H  | -5.66965600 | 1.56099900  | -1.74572700 |
| H  | -4.94689800 | -0.41564600 | -0.42230700 |
| H  | -3.22269500 | 2.18651600  | 2.53455500  |
| H  | -3.84999600 | 4.16528600  | 1.14977100  |
| H  | -5.10017000 | 3.85257300  | -0.97084000 |
| C  | -3.49671000 | -0.47556000 | 1.84948600  |
| H  | -3.12596500 | -0.17260300 | 2.84584200  |
| H  | -4.32379500 | -1.18703200 | 2.02231000  |

|   |             |             |            |
|---|-------------|-------------|------------|
| O | -2.48970000 | -1.08351500 | 1.09823500 |
| H | -0.04856300 | 1.10370100  | 3.28735000 |

#### TS4

|    |             |             |             |
|----|-------------|-------------|-------------|
| Au | 1.94493900  | 1.93270800  | -0.31200700 |
| Cu | 0.37998800  | -0.00163200 | 0.37224200  |
| Cu | -1.56951000 | 0.57572300  | 1.80356100  |
| Cu | -0.67630300 | 2.27345800  | -0.04079300 |
| Cu | -3.17863900 | 1.88781500  | 0.56082400  |
| Cu | 2.05794700  | -0.70265300 | -1.31851700 |
| Cu | -2.89135100 | -1.86073800 | -1.22916100 |
| Cu | -1.96016700 | 0.31622800  | -0.85121300 |
| Cu | -0.35057600 | -1.51856900 | -1.55285400 |
| Cu | 0.24328300  | 0.87277400  | -1.97156400 |
| Cu | -3.62128200 | -0.54686300 | 0.80981200  |
| Cu | 1.00495500  | -2.38097900 | 0.40917700  |
| Cu | -1.42524000 | -1.80930300 | 0.74484600  |
| O  | 0.38073800  | 0.17111600  | 2.53458100  |
| C  | 4.08989400  | -1.95465700 | -0.40319900 |
| C  | 3.92204300  | -0.79678100 | 0.36961300  |
| C  | 3.26696300  | -0.84275900 | 1.62018800  |
| C  | 2.78100400  | -2.08863800 | 2.06195700  |
| C  | 2.93571500  | -3.25153000 | 1.28410900  |
| C  | 3.59301800  | -3.18456800 | 0.04299700  |
| H  | 4.63843000  | -1.90273400 | -1.34087000 |
| H  | 4.33591300  | 0.15927400  | 0.05688800  |
| H  | 2.30261800  | -2.16103000 | 3.03835900  |
| H  | 2.60108700  | -4.21002900 | 1.67349400  |
| H  | 3.71698600  | -4.07938300 | -0.55809100 |
| C  | 3.00691300  | 0.41610200  | 2.36868600  |
| H  | 1.67952400  | 0.37821900  | 2.52336100  |
| H  | 3.21394700  | 0.33670200  | 3.45676800  |
| O  | 3.32068700  | 1.54576200  | 1.79399200  |
| H  | 0.29653400  | -0.77554700 | 2.74943300  |

#### Int6

|    |             |             |             |
|----|-------------|-------------|-------------|
| Au | -3.16280400 | 0.49311300  | 0.61637600  |
| Cu | -0.57096000 | 0.46949200  | 0.60668700  |
| Cu | 0.66248600  | -1.58188600 | 1.40902800  |
| Cu | -1.68902700 | -1.74720500 | 0.37046200  |
| Cu | 0.12139200  | -3.52629500 | -0.06002500 |
| Cu | -1.63372600 | 2.25211900  | -0.75190000 |
| Cu | 2.21148100  | -0.58534600 | -2.26184600 |
| Cu | 0.19481400  | -1.36223500 | -1.16400500 |
| Cu | 0.29778600  | 1.04201800  | -1.80007300 |
| Cu | -1.89809000 | -0.11353000 | -1.61834800 |
| Cu | 2.31833600  | -2.30499500 | -0.39007200 |
| Cu | 0.66566000  | 2.56471300  | 0.16867300  |
| Cu | 1.88445300  | 0.20222800  | 0.05050800  |
| O  | 0.93920200  | -1.91743600 | 3.45378300  |
| C  | 2.32226800  | 3.80750700  | 1.07223400  |
| C  | 2.27758900  | 2.68310800  | 1.90351800  |

|   |            |             |             |
|---|------------|-------------|-------------|
| C | 3.04974400 | 1.52385200  | 1.59528700  |
| C | 3.81264500 | 1.52279900  | 0.39494600  |
| C | 3.80944500 | 2.63756300  | -0.45005500 |
| C | 3.08972700 | 3.78653400  | -0.11535800 |
| H | 1.79821700 | 4.71424100  | 1.36465400  |
| H | 1.70777700 | 2.68301100  | 2.82844600  |
| H | 4.44324800 | 0.66419700  | 0.16868400  |
| H | 4.39361600 | 2.61266000  | -1.36527900 |
| H | 3.10484900 | 4.65387400  | -0.76631400 |
| C | 3.01150100 | 0.35945100  | 2.46564500  |
| H | 3.62764500 | -0.50151700 | 2.12709800  |
| O | 2.37938200 | 0.32130000  | 3.53905900  |
| H | 1.52281300 | -1.15445000 | 3.69499200  |
| H | 0.10362700 | -1.74700300 | 3.90037700  |

### **Cu<sub>13</sub> cluster**

#### **Cluster**

|    |             |             |             |
|----|-------------|-------------|-------------|
| Cu | 3.39584100  | 0.00002700  | -0.27008200 |
| Cu | 1.93285400  | -2.04919600 | 0.11728800  |
| Cu | 1.68803100  | 0.00001000  | 1.50982600  |
| Cu | 1.93277600  | 2.04921800  | 0.11728500  |
| Cu | 1.03352000  | -0.00001900 | -0.95545100 |
| Cu | -0.18560300 | -2.19444100 | -1.20985100 |
| Cu | -2.41746500 | -2.13839400 | -0.12614100 |
| Cu | -2.57438200 | 0.00001900  | 1.12571400  |
| Cu | -2.41747600 | 2.13833300  | -0.12617400 |
| Cu | -0.18564500 | 2.19425700  | -1.21006000 |
| Cu | -0.37362700 | 1.27369100  | 1.03414300  |
| Cu | -0.37366900 | -1.27348100 | 1.03413600  |
| Cu | -1.45515500 | -0.00002400 | -1.04063200 |

### **Cu<sub>13</sub>-O<sub>2</sub>**

|    |             |             |             |
|----|-------------|-------------|-------------|
| Cu | 3.32308600  | -1.05169100 | -0.28048900 |
| Cu | 1.29362400  | -2.39190600 | 0.39991800  |
| Cu | 1.81523700  | -0.25598600 | 1.53179200  |
| Cu | 2.63971000  | 1.34944500  | -0.17411400 |
| Cu | 1.03949600  | -0.33321800 | -0.91295700 |
| Cu | -0.81156100 | -1.99281400 | -1.02494200 |
| Cu | -2.89726100 | -1.06397000 | 0.20945100  |
| Cu | -2.27138100 | 1.09729900  | 1.23937700  |
| Cu | -1.49451000 | 2.92510400  | -0.27338600 |
| Cu | 0.55706400  | 2.07156500  | -1.44457100 |
| Cu | 0.25085200  | 1.59010800  | 0.94188400  |
| Cu | -0.57479500 | -0.78463900 | 1.19307700  |
| Cu | -1.31573800 | 0.53539800  | -0.92119400 |
| O  | -2.27974700 | -3.30855700 | -1.20170900 |
| O  | -3.35286100 | -2.83472000 | -0.55223600 |

### **Ads**

|    |            |            |             |
|----|------------|------------|-------------|
| Cu | 1.69593800 | 2.63626500 | -1.18028200 |
| Cu | 2.19835400 | 0.19713400 | -1.19034400 |

|    |             |             |             |
|----|-------------|-------------|-------------|
| Cu | 1.27063700  | 1.29415300  | 0.90918300  |
| Cu | -0.42488200 | 2.97451300  | 0.19739300  |
| Cu | -0.13472200 | 0.99475600  | -1.22436600 |
| Cu | 0.18762900  | -1.27356400 | -2.10031600 |
| Cu | -0.90503500 | -2.98541600 | -0.46398500 |
| Cu | -1.85340400 | -1.65708000 | 1.39627000  |
| Cu | -3.52851500 | 0.05996500  | 0.86145000  |
| Cu | -2.46276100 | 1.73766400  | -0.66845100 |
| Cu | -1.13888600 | 0.73017400  | 1.19090300  |
| Cu | 0.48821000  | -1.09802600 | 0.44076100  |
| Cu | -1.92426500 | -0.70904700 | -0.88261400 |
| O  | 1.47491600  | -2.71988000 | -1.71941500 |
| O  | 1.08067300  | -3.00549100 | -0.30672400 |
| C  | 3.20772300  | -1.02849300 | 1.39723500  |
| C  | 3.46228200  | 0.35273500  | 1.50370800  |
| C  | 2.86885200  | 1.11246000  | 2.52952500  |
| C  | 2.03424500  | 0.48080500  | 3.46759900  |
| C  | 1.78727900  | -0.88486300 | 3.37143100  |
| C  | 2.35422900  | -1.63096600 | 2.33207900  |
| H  | 4.15204500  | 0.82529200  | 0.80683100  |
| H  | 3.11925100  | 2.16477300  | 2.63780000  |
| H  | 1.58154600  | 1.06555000  | 4.26213300  |
| H  | 1.12720300  | -1.36883500 | 4.08470600  |
| H  | 2.14746100  | -2.69514800 | 2.23974700  |
| C  | 3.86545300  | -1.83011600 | 0.30742500  |
| H  | 3.60476400  | -2.88766800 | 0.41604000  |
| H  | 4.95588300  | -1.73609200 | 0.39510000  |
| O  | 3.50349500  | -1.38833600 | -1.00141400 |
| H  | 2.77819600  | -2.03082800 | -1.35840500 |

## TS1

|    |             |             |             |
|----|-------------|-------------|-------------|
| Cu | 1.72794000  | 2.62819800  | -1.17132700 |
| Cu | 2.22433500  | 0.19750500  | -1.19121600 |
| Cu | 1.29272400  | 1.27565000  | 0.91746400  |
| Cu | -0.38498700 | 2.97548200  | 0.21045600  |
| Cu | -0.11112400 | 0.99528700  | -1.22077100 |
| Cu | 0.18423900  | -1.28253400 | -2.09153600 |
| Cu | -0.96734000 | -2.97107600 | -0.46959600 |
| Cu | -1.87727600 | -1.62797200 | 1.39681200  |
| Cu | -3.52823800 | 0.10516200  | 0.84071500  |
| Cu | -2.43417700 | 1.77521300  | -0.67073900 |
| Cu | -1.12623700 | 0.73965800  | 1.18805100  |
| Cu | 0.48303300  | -1.11072000 | 0.44209900  |
| Cu | -1.92314900 | -0.67888600 | -0.88836300 |
| O  | 1.47031000  | -2.76714700 | -1.69271100 |
| O  | 1.01292700  | -3.05008800 | -0.29410900 |
| C  | 3.18377900  | -1.06869300 | 1.38188300  |
| C  | 3.45349900  | 0.30849800  | 1.51343100  |
| C  | 2.87018800  | 1.05797900  | 2.55292000  |
| C  | 2.02961200  | 0.42033500  | 3.48212800  |
| C  | 1.76783500  | -0.94016900 | 3.36289500  |
| C  | 2.32548400  | -1.67572200 | 2.30966700  |

|   |            |             |             |
|---|------------|-------------|-------------|
| H | 4.15096500 | 0.78348700  | 0.82568400  |
| H | 3.13501300 | 2.10469600  | 2.68034100  |
| H | 1.58517400 | 0.99666400  | 4.28741400  |
| H | 1.10569400 | -1.42969800 | 4.07064100  |
| H | 2.11004300 | -2.73686900 | 2.20242000  |
| C | 3.81797200 | -1.85309900 | 0.26204600  |
| H | 3.59879200 | -2.91964600 | 0.39602900  |
| H | 4.90973500 | -1.72826300 | 0.31516800  |
| O | 3.38251500 | -1.43786400 | -1.02080300 |
| H | 2.55580700 | -2.13240400 | -1.37596300 |

### Int1

|    |             |             |             |
|----|-------------|-------------|-------------|
| Cu | 1.85706500  | 2.53589400  | -1.20503700 |
| Cu | 2.25983500  | 0.08968800  | -1.20030400 |
| Cu | 1.37162700  | 1.21477100  | 0.90276300  |
| Cu | -0.23096600 | 2.97725400  | 0.19477800  |
| Cu | -0.05015700 | 0.99068100  | -1.23267700 |
| Cu | 0.13245900  | -1.28536100 | -2.10269500 |
| Cu | -1.11617500 | -2.91447500 | -0.47483900 |
| Cu | -1.92372600 | -1.53662800 | 1.40439500  |
| Cu | -3.50889900 | 0.25639200  | 0.82539000  |
| Cu | -2.34415500 | 1.88019500  | -0.67678100 |
| Cu | -1.07222300 | 0.78245000  | 1.17048300  |
| Cu | 0.46833100  | -1.15075400 | 0.41852100  |
| Cu | -1.93842300 | -0.59498400 | -0.89070000 |
| O  | 1.35450300  | -2.92665300 | -1.73059000 |
| O  | 0.86191700  | -3.16268700 | -0.32569800 |
| C  | 3.03217800  | -1.14067600 | 1.46562600  |
| C  | 3.35512900  | 0.22444300  | 1.63982600  |
| C  | 2.77581800  | 0.97012300  | 2.68483000  |
| C  | 1.88848500  | 0.34516600  | 3.58086600  |
| C  | 1.57549500  | -0.99776200 | 3.42149400  |
| C  | 2.12893100  | -1.73154600 | 2.36120400  |
| H  | 4.09881600  | 0.67877300  | 0.98777000  |
| H  | 3.08071200  | 2.00093700  | 2.84747300  |
| H  | 1.44984200  | 0.92023300  | 4.39022100  |
| H  | 0.88163200  | -1.47891600 | 4.10461300  |
| H  | 1.88627800  | -2.78502100 | 2.23178700  |
| C  | 3.66803000  | -1.93226900 | 0.34766000  |
| H  | 3.37366600  | -2.98759500 | 0.47355500  |
| H  | 4.76426800  | -1.89128500 | 0.49230400  |
| O  | 3.34024700  | -1.47716000 | -0.93117600 |
| H  | 2.23384600  | -2.45855800 | -1.50264700 |

### TS<sub>o-oc</sub>

|    |             |             |             |
|----|-------------|-------------|-------------|
| Cu | -1.99353800 | -2.40857100 | -1.24353000 |
| Cu | -2.24554100 | 0.07417000  | -1.19486200 |
| Cu | -1.43621300 | -1.13124000 | 0.88379800  |
| Cu | 0.06713400  | -2.97433700 | 0.12824500  |
| Cu | 0.00124000  | -0.96662500 | -1.26826900 |
| Cu | -0.07824500 | 1.34870800  | -2.09460500 |
| Cu | 1.32634800  | 2.88731800  | -0.42142900 |

|    |             |             |             |
|----|-------------|-------------|-------------|
| Cu | 1.97348200  | 1.40997900  | 1.45250700  |
| Cu | 3.47806200  | -0.43160300 | 0.83075300  |
| Cu | 2.24269900  | -1.99211900 | -0.70205800 |
| Cu | 1.01838800  | -0.85674200 | 1.16276600  |
| Cu | -0.40168600 | 1.18443400  | 0.41846000  |
| Cu | 1.94013700  | 0.49654800  | -0.87187100 |
| O  | -1.25895000 | 2.91919800  | -1.94852100 |
| O  | -0.56490200 | 3.13654400  | -0.29276200 |
| C  | -2.91818500 | 1.25408400  | 1.53185500  |
| C  | -3.35049300 | -0.08844600 | 1.62921700  |
| C  | -2.86010400 | -0.92507900 | 2.65084700  |
| C  | -1.95278600 | -0.41419100 | 3.59767600  |
| C  | -1.54362000 | 0.91075500  | 3.52066200  |
| C  | -2.01066500 | 1.73442600  | 2.48734100  |
| H  | -4.09768500 | -0.45154600 | 0.92631400  |
| H  | -3.24287600 | -1.93772300 | 2.75186900  |
| H  | -1.57719700 | -1.06136400 | 4.38435400  |
| H  | -0.83518800 | 1.30290200  | 4.24452900  |
| H  | -1.68403400 | 2.77077900  | 2.41567200  |
| C  | -3.43834600 | 2.14285500  | 0.42779500  |
| H  | -2.88483400 | 3.09690200  | 0.48600500  |
| H  | -4.49368000 | 2.38108800  | 0.66622200  |
| O  | -3.36259800 | 1.58072600  | -0.84180300 |
| H  | -2.12346300 | 2.56309600  | -1.59991400 |

### Into-oc

|    |             |             |             |
|----|-------------|-------------|-------------|
| Cu | -2.24072800 | -2.31538800 | -0.95744100 |
| Cu | -2.33381400 | 0.14291300  | -0.95986700 |
| Cu | -1.44119600 | -1.19857300 | 1.10651000  |
| Cu | -0.04225500 | -3.05652500 | 0.15429600  |
| Cu | -0.19203200 | -0.96208300 | -1.18713700 |
| Cu | -0.34662500 | 1.55849100  | -1.79827600 |
| Cu | 1.22698900  | 2.86450900  | -0.27205100 |
| Cu | 2.19910900  | 1.11491500  | 1.52590900  |
| Cu | 3.50770400  | -0.69650600 | 0.58946200  |
| Cu | 1.98665100  | -2.06006100 | -1.00550200 |
| Cu | 1.11537900  | -1.12106600 | 1.14579500  |
| Cu | -0.25871300 | 1.00787400  | 0.71480300  |
| Cu | 1.80436000  | 0.42904100  | -0.87858800 |
| O  | 1.06114500  | 3.01238900  | -2.15144800 |
| O  | 0.92720800  | 2.50702700  | 1.51519500  |
| C  | -2.91447100 | 1.98150100  | 0.83771800  |
| C  | -3.89407900 | 0.97321700  | 0.74171500  |
| C  | -3.94247300 | -0.07395500 | 1.66639200  |
| C  | -2.99710100 | -0.13710200 | 2.70371300  |
| C  | -2.06617500 | 0.90064900  | 2.85077400  |
| C  | -2.04273800 | 1.97156100  | 1.94021500  |
| H  | -4.60822500 | 1.00881800  | -0.08034100 |
| H  | -4.69887800 | -0.84738800 | 1.57323000  |
| H  | -3.02859500 | -0.94859100 | 3.42594000  |
| H  | -1.34882700 | 0.88036700  | 3.66632000  |
| H  | -1.30731600 | 2.76480400  | 2.06255800  |

|   |             |            |             |
|---|-------------|------------|-------------|
| C | -2.68374000 | 2.88422100 | -0.35568000 |
| H | -1.90167300 | 3.62175400 | -0.10752000 |
| H | -3.60013700 | 3.44568100 | -0.60005600 |
| O | -2.32075600 | 2.08667600 | -1.46088200 |
| H | 1.83750300  | 2.70657000 | -2.63158200 |

## TS2

|    |             |             |             |
|----|-------------|-------------|-------------|
| O  | 1.91013700  | -1.63238700 | 2.73127600  |
| O  | 1.05371900  | -2.12773500 | -0.97698400 |
| C  | 5.28622800  | -0.75788700 | -1.30583000 |
| C  | 5.59276800  | -1.27883900 | -0.04392700 |
| C  | 4.96268600  | -0.79700600 | 1.09725500  |
| C  | 3.99819400  | 0.22236200  | 1.02590800  |
| C  | 3.73386200  | 0.79990700  | -0.24872300 |
| C  | 4.37604100  | 0.29972500  | -1.40945600 |
| H  | 5.76683500  | -1.15053800 | -2.19578500 |
| H  | 6.31794900  | -2.08294800 | 0.04167700  |
| H  | 5.19739600  | -1.22944600 | 2.06873800  |
| H  | 3.12984600  | 1.71013100  | -0.28212000 |
| H  | 4.21027900  | 0.78612900  | -2.36820700 |
| C  | 3.18193700  | 0.60627400  | 2.19511800  |
| H  | 3.77947000  | 0.80893900  | 3.10288600  |
| H  | 2.62238600  | -0.50930700 | 2.54457700  |
| O  | 2.17632700  | 1.45689800  | 1.99134100  |
| H  | 2.58428200  | -2.32093800 | 2.78562600  |
| Cu | -0.20473600 | 3.35109900  | 0.04403300  |
| Cu | -1.48256000 | 1.42900100  | -0.88543700 |
| Cu | 0.82001900  | 1.83788800  | -1.61025100 |
| Cu | 0.74066100  | 1.02053300  | 0.73483000  |
| Cu | 2.37204300  | -0.64830900 | -0.93202300 |
| Cu | 1.11711900  | -1.68565300 | 0.97476300  |
| Cu | -0.81545800 | -2.61797100 | -0.44653400 |
| Cu | -0.00768300 | -0.46864200 | -1.41905100 |
| Cu | -2.45812800 | -0.80308100 | -1.41051200 |
| Cu | -3.00219300 | -2.21725700 | 0.54238600  |
| Cu | -3.37419800 | 0.51049900  | 0.41909300  |
| Cu | -1.20650900 | -0.56531500 | 0.94063100  |
| Cu | -1.51631400 | 1.81743400  | 1.54722700  |

## Int2

|    |             |             |             |
|----|-------------|-------------|-------------|
| Cu | -2.39275000 | -2.13834400 | -1.05388500 |
| Cu | -2.25612100 | 0.36204300  | -1.04433900 |
| Cu | -1.54986600 | -0.96827600 | 1.02220200  |
| Cu | -0.35145300 | -2.99053600 | 0.14428600  |
| Cu | -0.22709500 | -0.94654300 | -1.19511600 |
| Cu | -0.04350100 | 1.41081500  | -2.00029400 |
| Cu | 1.60032300  | 2.71672100  | -0.57113000 |
| Cu | 2.23315500  | 1.16499200  | 1.41860700  |
| Cu | 3.38282100  | -0.85952300 | 0.66472700  |
| Cu | 1.85818800  | -2.23649200 | -0.91523400 |
| Cu | 0.96031900  | -1.06207500 | 1.13306000  |
| Cu | -0.13861700 | 1.15475900  | 0.54820600  |

|    |             |             |             |
|----|-------------|-------------|-------------|
| Cu | 1.91607500  | 0.27244600  | -0.96165800 |
| O  | -1.39870600 | 2.70286300  | -2.96497700 |
| O  | 1.03133700  | 2.67790000  | 1.22831100  |
| C  | -2.50254900 | 1.81691300  | 1.50081900  |
| C  | -3.31843300 | 0.64726700  | 1.48186400  |
| C  | -3.17599500 | -0.32226500 | 2.48542100  |
| C  | -2.20516800 | -0.14432100 | 3.48745400  |
| C  | -1.46949600 | 1.04898500  | 3.56144700  |
| C  | -1.61516900 | 2.02361000  | 2.58633300  |
| H  | -4.08169000 | 0.54403400  | 0.71477600  |
| H  | -3.82389500 | -1.19395400 | 2.49645800  |
| H  | -2.06550600 | -0.91642500 | 4.23748000  |
| H  | -0.73747800 | 1.18416000  | 4.35076000  |
| H  | -0.97238000 | 2.90080800  | 2.58065900  |
| C  | -2.44182700 | 2.66797800  | 0.33989900  |
| H  | -2.09609100 | 2.80432300  | -2.27969400 |
| H  | -1.83741600 | 3.58687800  | 0.40874700  |
| O  | -2.99904500 | 2.35183500  | -0.75701000 |
| H  | -1.83526700 | 2.28077400  | -3.71270700 |

### Int3

|    |             |             |             |
|----|-------------|-------------|-------------|
| Cu | 3.43883200  | -0.17960800 | -0.21898100 |
| Cu | 1.84166800  | -2.09157200 | 0.03355300  |
| Cu | 1.68337000  | -0.12480300 | 1.53124800  |
| Cu | 2.13612000  | 1.92470100  | 0.18017400  |
| Cu | 1.08076100  | 0.01290200  | -0.97948600 |
| Cu | -0.32331900 | -2.02010800 | -1.31993800 |
| Cu | -2.67305700 | -1.79326100 | -0.15614100 |
| Cu | -2.55068600 | 0.28505500  | 1.15038300  |
| Cu | -2.20667400 | 2.37655400  | -0.10323800 |
| Cu | 0.03874100  | 2.25072600  | -1.20996800 |
| Cu | -0.24315200 | 1.26164900  | 1.03706400  |
| Cu | -0.46484100 | -1.30345400 | 1.06902000  |
| Cu | -1.41932600 | 0.21723500  | -1.04917000 |
| O  | -1.22683300 | -2.95806200 | 0.12861300  |

### Int4

|    |             |             |             |
|----|-------------|-------------|-------------|
| Cu | 1.69386100  | 2.73785700  | -0.39988900 |
| Cu | 2.21876400  | 0.24867000  | -0.35413000 |
| Cu | 0.77431600  | 1.32945000  | 1.40395600  |
| Cu | -0.69968000 | 3.02838700  | 0.32349200  |
| Cu | -0.00756700 | 1.05849600  | -1.00710900 |
| Cu | 0.58941400  | -1.29614800 | -1.64455400 |
| Cu | -0.90301900 | -3.02703300 | -0.46011700 |
| Cu | -2.25133100 | -1.75250000 | 1.19110500  |
| Cu | -3.79141200 | -0.06198500 | 0.20728600  |
| Cu | -2.42716700 | 1.71268800  | -0.94084300 |
| Cu | -1.58763600 | 0.72941100  | 1.17128200  |
| Cu | 0.20286700  | -1.03476100 | 0.86983200  |
| Cu | -1.74295000 | -0.71250400 | -0.97878500 |
| O  | 0.84228300  | -3.10973600 | -1.16235700 |
| C  | 3.70673100  | -1.41673600 | -0.56390900 |

|   |            |             |             |
|---|------------|-------------|-------------|
| C | 3.72050300 | -1.40173500 | 0.84946400  |
| C | 4.49834400 | -0.44028400 | 1.50488900  |
| C | 5.26670400 | 0.47694300  | 0.78640100  |
| C | 5.23909900 | 0.47282800  | -0.60595100 |
| C | 4.45024300 | -0.46325100 | -1.28178200 |
| H | 3.13791700 | -2.18441800 | -1.08972100 |
| H | 4.49985600 | -0.41665100 | 2.59253500  |
| H | 5.86650900 | 1.21070300  | 1.31664100  |
| H | 5.81735900 | 1.19950000  | -1.16819500 |
| H | 4.42674400 | -0.47798700 | -2.36749000 |
| C | 2.93408800 | -2.42318800 | 1.62628200  |
| H | 3.44810100 | -3.39491200 | 1.57166900  |
| H | 2.90657500 | -2.13584000 | 2.68336200  |
| O | 1.59912900 | -2.58093600 | 1.19680300  |
| H | 1.48605900 | -2.94325700 | 0.22905100  |

### TS3

|    |             |             |             |
|----|-------------|-------------|-------------|
| Cu | 1.70634800  | 2.72612500  | -0.39595800 |
| Cu | 2.22046500  | 0.23428400  | -0.33434900 |
| Cu | 0.76914900  | 1.33266300  | 1.40938500  |
| Cu | -0.69266400 | 3.02818400  | 0.31298200  |
| Cu | 0.00044400  | 1.05094600  | -1.00556600 |
| Cu | 0.59173700  | -1.30601000 | -1.63089400 |
| Cu | -0.91058200 | -3.02627300 | -0.44822700 |
| Cu | -2.26496500 | -1.74193800 | 1.18971500  |
| Cu | -3.79406300 | -0.05032400 | 0.19187600  |
| Cu | -2.41896400 | 1.71605300  | -0.95529600 |
| Cu | -1.59256200 | 0.73641700  | 1.16484400  |
| Cu | 0.19581800  | -1.03270500 | 0.88650200  |
| Cu | -1.74113800 | -0.71090900 | -0.98014600 |
| O  | 0.85285700  | -3.12260800 | -1.12837000 |
| C  | 3.71562900  | -1.41411400 | -0.57945700 |
| C  | 3.71636000  | -1.40020600 | 0.83449100  |
| C  | 4.48894600  | -0.43765400 | 1.49588800  |
| C  | 5.26419700  | 0.47882500  | 0.78382000  |
| C  | 5.24981800  | 0.47382900  | -0.60893700 |
| C  | 4.46661700  | -0.46194500 | -1.29103900 |
| H  | 3.15309700  | -2.18336700 | -1.10920700 |
| H  | 4.48069200  | -0.41408200 | 2.58357000  |
| H  | 5.85946300  | 1.21266700  | 1.31916300  |
| H  | 5.83378200  | 1.19985200  | -1.16614500 |
| H  | 4.45190700  | -0.47614000 | -2.37692200 |
| C  | 2.91585600  | -2.41959500 | 1.60219800  |
| H  | 3.42987200  | -3.39240700 | 1.54792300  |
| H  | 2.89065400  | -2.13433000 | 2.66139500  |
| O  | 1.59081600  | -2.56847600 | 1.15723800  |
| H  | 1.44492100  | -2.93716700 | 0.14637000  |

### Int5

|    |            |            |             |
|----|------------|------------|-------------|
| Cu | 0.82673100 | 3.30182100 | -0.51414700 |
| Cu | 2.15344200 | 1.20794400 | -0.53978900 |
| Cu | 0.49233500 | 1.67355100 | 1.32746100  |

|    |             |             |             |
|----|-------------|-------------|-------------|
| Cu | -1.50651600 | 2.72677000  | 0.29057700  |
| Cu | -0.22796600 | 1.08741600  | -1.04754300 |
| Cu | 1.20793400  | -0.95132100 | -1.67803500 |
| Cu | 0.21653300  | -2.96557500 | -0.41029000 |
| Cu | -1.46509600 | -2.20063300 | 1.23081000  |
| Cu | -3.45451300 | -1.11630800 | 0.24347800  |
| Cu | -2.72510700 | 0.93640800  | -0.98834400 |
| Cu | -1.62722000 | 0.34671800  | 1.17586100  |
| Cu | 0.59820200  | -0.74720800 | 0.80697400  |
| Cu | -1.29330400 | -1.10598800 | -1.00034400 |
| O  | 1.62704200  | -2.99727300 | -1.73655500 |
| C  | 3.85924900  | 0.32279100  | 1.14593400  |
| C  | 3.61469200  | -0.83728900 | 0.39192000  |
| C  | 2.85009800  | -1.86672700 | 0.96765000  |
| C  | 2.31100700  | -1.71666500 | 2.25766500  |
| C  | 2.52765400  | -0.53433200 | 2.97574600  |
| C  | 3.31593800  | 0.47819700  | 2.42502500  |
| H  | 4.48340000  | 1.10736800  | 0.71740000  |
| H  | 2.69227800  | -2.78114300 | 0.39555900  |
| H  | 1.73644700  | -2.52667700 | 2.70024500  |
| H  | 2.09107000  | -0.41423900 | 3.96247100  |
| H  | 3.51255800  | 1.38429100  | 2.99166900  |
| C  | 3.99209900  | -0.86828200 | -1.06898600 |
| H  | 5.01627200  | -0.48038500 | -1.20129700 |
| H  | 3.96633800  | -1.90482000 | -1.43679600 |
| O  | 3.08290200  | -0.06105900 | -1.78124500 |
| H  | 1.32947200  | -3.39815000 | -2.55997500 |

#### TS4

|    |             |             |             |
|----|-------------|-------------|-------------|
| Cu | 0.20825500  | 3.35591700  | -0.64601600 |
| Cu | 1.86556200  | 1.45346300  | -0.61463100 |
| Cu | 0.18885800  | 1.76763400  | 1.23817700  |
| Cu | -2.02380200 | 2.50391400  | 0.28606100  |
| Cu | -0.55596900 | 1.05968200  | -1.04628900 |
| Cu | 1.07519200  | -0.64203100 | -1.82458500 |
| Cu | 0.84921500  | -2.82448200 | -0.46160400 |
| Cu | -0.91562200 | -2.42291600 | 1.22122600  |
| Cu | -3.17172700 | -1.74767600 | 0.42773500  |
| Cu | -2.94398800 | 0.42124700  | -0.79473500 |
| Cu | -1.61497300 | 0.06759700  | 1.23936600  |
| Cu | 0.76765500  | -0.58978500 | 0.72898100  |
| Cu | -1.14454200 | -1.36418000 | -0.95246700 |
| O  | 2.67766100  | -3.14533000 | -1.17039100 |
| C  | 3.80521200  | 1.00345900  | 0.70635000  |
| C  | 3.57778800  | -0.34368600 | 0.34286500  |
| C  | 3.12708500  | -1.23229800 | 1.33927500  |
| C  | 2.87352200  | -0.77518600 | 2.63808700  |
| C  | 3.10217300  | 0.55916200  | 2.97634400  |
| C  | 3.58832600  | 1.44303700  | 2.01558300  |
| H  | 4.21149300  | 1.68459400  | -0.04316100 |
| H  | 2.98813200  | -2.28375500 | 1.09289100  |
| H  | 2.49330000  | -1.46903400 | 3.38254500  |

|   |            |             |             |
|---|------------|-------------|-------------|
| H | 2.90294200 | 0.90507500  | 3.98609500  |
| H | 3.78123700 | 2.48071800  | 2.27300300  |
| C | 3.68954500 | -0.73971000 | -1.10077200 |
| H | 4.71224400 | -0.96020700 | -1.45123500 |
| H | 3.18627700 | -2.05439000 | -1.19230600 |
| O | 3.00262400 | 0.09548700  | -1.92050200 |
| H | 2.76091200 | -3.50602500 | -2.06242500 |

## Int6

|    |             |             |             |
|----|-------------|-------------|-------------|
| Cu | 0.18464800  | -3.35041300 | -0.74030400 |
| Cu | -1.73629500 | -1.74983200 | -0.39748000 |
| Cu | 0.20766900  | -1.88543000 | 1.28688900  |
| Cu | 2.32263000  | -2.18684100 | -0.00740900 |
| Cu | 0.50574700  | -0.94284000 | -1.05467500 |
| Cu | -1.36465000 | 0.52256200  | -1.62112100 |
| Cu | -1.38824100 | 2.60032000  | -0.02018900 |
| Cu | 0.70073200  | 2.43078700  | 1.36519900  |
| Cu | 2.92739000  | 2.11584500  | 0.31116600  |
| Cu | 2.80264300  | 0.04369400  | -1.11845400 |
| Cu | 1.76510200  | 0.07395000  | 1.13986000  |
| Cu | -0.71557400 | 0.38905800  | 0.89025300  |
| Cu | 0.80201700  | 1.55983100  | -0.87174400 |
| O  | -2.46250800 | 1.66036000  | -3.01039800 |
| C  | -3.80796500 | -1.15868600 | 0.38342200  |
| C  | -3.51710000 | 0.24100600  | 0.56674200  |
| C  | -2.77929800 | 0.61986500  | 1.74799700  |
| C  | -2.23095700 | -0.36615900 | 2.57701300  |
| C  | -2.42881000 | -1.74337200 | 2.31158500  |
| C  | -3.30158900 | -2.12167300 | 1.25843300  |
| H  | -4.48710500 | -1.44947400 | -0.41606700 |
| H  | -2.75012900 | 1.66736900  | 2.03586300  |
| H  | -1.68671800 | -0.06974500 | 3.46965400  |
| H  | -2.02886700 | -2.49240100 | 2.98839900  |
| H  | -3.56688100 | -3.16637700 | 1.12530400  |
| C  | -3.84275200 | 1.17568300  | -0.43423700 |
| H  | -4.49606200 | 0.81180100  | -1.24691000 |
| O  | -3.39462200 | 2.38806600  | -0.51509800 |
| H  | -2.95165400 | 2.22460100  | -2.37518600 |
| H  | -3.12544000 | 1.20684600  | -3.54057900 |
